# Supplementary material for: Deforestation perspectives of dry temperate forests: main drivers and possible strategies
Source: Frontiers journal article supplement (doi:10.3389/fenvs.2023.1151320), 2023-08-17
Supplement: Table_1.XLSX [file Table_1.XLSX]

## Sheet: Sheet1
Forest Range	Strata	Plot No	Latitude	Longitude	Elevation	Aspect	Tree No	Local Name	Scientific Name	DBH (>=5 cm)
Chilas Head Quater Range	Dense Mix Forests	14	35.54	74.31	2763	South	6	Birch	Betula Utilis	33
Chilas Head Quater Range	Dense Mix Forests	14	35.54	74.31	2763	South	7	Birch	Betula Utilis	36
Chilas Head Quater Range	Dense Mix Forests	15	35.54	74.31	2763	South	30	Birch	Betula Utilis	20
Chilas Head Quater Range	Dense Mix Forests	15	35.54	74.31	2763	South	31	Birch	Betula Utilis	22
Gunar Range	Dense Mix Forests	24	35.5356	74.308	2887	South West	12	Birch	Betula Utilis	32
Gunar Range	Dense Mix Forests	24	35.5356	74.308	2887	South West	13	Birch	Betula Utilis	25
Gunar Range	Dense Mix Forests	24	35.5356	74.308	2887	South West	14	Birch	Betula Utilis	26
Gunar Range	Dense Mix Forests	24	35.5356	74.308	2887	South West	15	Birch	Betula Utilis	22
Gunar Range	Dense Mix Forests	24	35.5356	74.308	2887	South West	16	Birch	Betula Utilis	22
Thore Range	Dense Mix Forests	2	35.4034	73.7678	2348	North	7	Chilgoza	Pinus gerardiana	47.6229
Thore Range	Dense Mix Forests	2	35.4034	73.7678	2348	North	16	Chilgoza	Pinus gerardiana	15.5312
Thore Range	Dense Mix Forests	3	35.4034	73.7678	2348	North	3	Chilgoza	Pinus gerardiana	23.2968
Thore Range	Dense Mix Forests	3	35.4034	73.7678	2348	North	7	Chilgoza	Pinus gerardiana	40.7694
Thore Range	Dense Mix Forests	3	35.4034	73.7678	2348	North	14	Chilgoza	Pinus gerardiana	65.0369
Thore Range	Dense Mix Forests	3	35.4034	73.7678	2348	North	15	Chilgoza	Pinus gerardiana	30.0917
Thore Range	Sparse Pure Conifer	5	35.2736	73.9556	2763	South	4	Chilgoza	Pinus gerardiana	11.6484
Thore Range	Sparse Pure Conifer	5	35.2736	73.9556	2763	South	5	Chilgoza	Pinus gerardiana	11.6484
Thore Range	Sparse Pure Conifer	5	35.2736	73.9556	2763	South	6	Chilgoza	Pinus gerardiana	20.4818
Thore Range	Sparse Pure Conifer	5	35.2736	73.9556	2763	South	7	Chilgoza	Pinus gerardiana	35.9159
Thore Range	Sparse Pure Conifer	5	35.2736	73.9556	2763	South	12	Chilgoza	Pinus gerardiana	35.9159
Thore Range	Sparse Pure Conifer	6	35.2736	73.9556	2763	South	1	Chilgoza	Pinus gerardiana	13.8334
Thore Range	Sparse Pure Conifer	6	35.2736	73.9556	2763	South	3	Chilgoza	Pinus gerardiana	11.6484
Thore Range	Sparse Pure Conifer	6	35.2736	73.9556	2763	South	4	Chilgoza	Pinus gerardiana	17.4726
Thore Range	Sparse Pure Conifer	6	35.2736	73.9556	2763	South	5	Chilgoza	Pinus gerardiana	10.6777
Thore Range	Sparse Pure Conifer	6	35.2736	73.9556	2763	South	8	Chilgoza	Pinus gerardiana	20.3847
Thore Range	Sparse Pure Conifer	6	35.2736	73.9556	2763	South	12	Chilgoza	Pinus gerardiana	15.5312
Thore Range	Dense Pure Conifer	7	35.5516	74.5138	2784	South East	1	Chilgoza	Pinus gerardiana	40.7694
Thore Range	Dense Pure Conifer	7	35.5516	74.5138	2784	South East	2	Chilgoza	Pinus gerardiana	43.6815
Chilas Head Quater Range	Dense Pure Conifer	7	35.5516	74.5138	2784	South East	3	Chilgoza	Pinus gerardiana	15.5312
Chilas Head Quater Range	Dense Pure Conifer	7	35.5516	74.5138	2784	South East	4	Chilgoza	Pinus gerardiana	30.0917
Chilas Head Quater Range	Dense Pure Conifer	7	35.5516	74.5138	2784	South East	5	Chilgoza	Pinus gerardiana	20.4818
Chilas Head Quater Range	Dense Pure Conifer	7	35.5516	74.5138	2784	South East	6	Chilgoza	Pinus gerardiana	16.5019
Chilas Head Quater Range	Dense Pure Conifer	7	35.5516	74.5138	2784	South East	7	Chilgoza	Pinus gerardiana	23.2968
Chilas Head Quater Range	Dense Pure Conifer	7	35.5516	74.5138	2784	South East	8	Chilgoza	Pinus gerardiana	16.5019
Chilas Head Quater Range	Dense Pure Conifer	7	35.5516	74.5138	2784	South East	9	Chilgoza	Pinus gerardiana	21.3554
Chilas Head Quater Range	Dense Pure Conifer	7	35.5516	74.5138	2784	South East	10	Chilgoza	Pinus gerardiana	19.414
Chilas Head Quater Range	Dense Pure Conifer	7	35.5516	74.5138	2784	South East	11	Chilgoza	Pinus gerardiana	34.9452
Chilas Head Quater Range	Dense Pure Conifer	7	35.5516	74.5138	2784	South East	12	Chilgoza	Pinus gerardiana	33.9745
Chilas Head Quater Range	Dense Pure Conifer	7	35.5516	74.5138	2784	South East	13	Chilgoza	Pinus gerardiana	33.9745
Chilas Head Quater Range	Dense Pure Conifer	7	35.5516	74.5138	2784	South East	14	Chilgoza	Pinus gerardiana	33.9745
Chilas Head Quater Range	Dense Pure Conifer	7	35.5516	74.5138	2784	South East	15	Chilgoza	Pinus gerardiana	33.0038
Chilas Head Quater Range	Dense Pure Conifer	7	35.5516	74.5138	2784	South East	16	Chilgoza	Pinus gerardiana	28.1503
Chilas Head Quater Range	Dense Pure Conifer	7	35.5516	74.5138	2784	South East	17	Chilgoza	Pinus gerardiana	27.1796
Chilas Head Quater Range	Dense Pure Conifer	7	35.5516	74.5138	2784	South East	18	Chilgoza	Pinus gerardiana	14.5605
Chilas Head Quater Range	Dense Pure Conifer	7	35.5516	74.5138	2784	South East	19	Chilgoza	Pinus gerardiana	32.0331
Chilas Head Quater Range	Dense Pure Conifer	7	35.5516	74.5138	2784	South East	20	Chilgoza	Pinus gerardiana	13.5898
Chilas Head Quater Range	Dense Pure Conifer	7	35.5516	74.5138	2784	South East	21	Chilgoza	Pinus gerardiana	23.2968
Chilas Head Quater Range	Dense Pure Conifer	7	35.5516	74.5138	2784	South East	22	Chilgoza	Pinus gerardiana	17.4726
Chilas Head Quater Range	Dense Pure Conifer	8	35.5516	74.5138	2784	South East	1	Chilgoza	Pinus gerardiana	41.7401
Chilas Head Quater Range	Dense Pure Conifer	8	35.5516	74.5138	2784	South East	2	Chilgoza	Pinus gerardiana	18.4433
Chilas Head Quater Range	Dense Pure Conifer	8	35.5516	74.5138	2784	South East	3	Chilgoza	Pinus gerardiana	32.0331
Chilas Head Quater Range	Dense Pure Conifer	8	35.5516	74.5138	2784	South East	4	Chilgoza	Pinus gerardiana	26.2089
Chilas Head Quater Range	Dense Pure Conifer	8	35.5516	74.5138	2784	South East	5	Chilgoza	Pinus gerardiana	35.9159
Gunar Range	Dense Pure Conifer	8	35.5516	74.5138	2784	South East	6	Chilgoza	Pinus gerardiana	33.9745
Gunar Range	Dense Pure Conifer	8	35.5516	74.5138	2784	South East	7	Chilgoza	Pinus gerardiana	38.828
Gunar Range	Dense Pure Conifer	8	35.5516	74.5138	2784	South East	8	Chilgoza	Pinus gerardiana	14.5605
Gunar Range	Dense Pure Conifer	8	35.5516	74.5138	2784	South East	9	Chilgoza	Pinus gerardiana	26.2089
Thore Range	Dense Pure Conifer	11	35.3592	73.76	2490	South East	21	Chilgoza	Pinus gerardiana	31
Thore Range	Dense Pure Conifer	16	35.5242	74.304	2763	South	25	Chilgoza	Pinus gerardiana	10
Thore Range	Dense Pure Conifer	17	35.5242	74.304	2763	South	9	Chilgoza	Pinus gerardiana	35
Thore Range	Sparse Mix Forests	19	35.5166	74.3065	2687	North East	11	Chilgoza	Pinus gerardiana	39
Thore Range	Sparse Mix Forests	20	35.5166	74.3065	2687	North East	5	Chilgoza	Pinus gerardiana	10
Thore Range	Sparse Mix Forests	20	35.5166	74.3065	2687	North East	6	Chilgoza	Pinus gerardiana	45
Thore Range	Sparse Mix Forests	20	35.5166	74.3065	2687	North East	8	Chilgoza	Pinus gerardiana	12
Thore Range	Sparse Mix Forests	21	35.5166	74.3065	2687	North East	4	Chilgoza	Pinus gerardiana	35
Thore Range	Sparse Mix Forests	22	35.5166	74.3065	2687	North East	2	Chilgoza	Pinus gerardiana	46
Thore Range	Sparse Mix Forests	23	35.5166	74.3065	2687	North East	3	Chilgoza	Pinus gerardiana	45
Thore Range	Sparse Mix Forests	23	35.5166	74.3065	2687	North East	15	Chilgoza	Pinus gerardiana	38
Thore Range	Sparse Mix Forests	23	35.5166	74.3065	2687	North East	18	Chilgoza	Pinus gerardiana	29
Thore Range	Sparse Mix Forests	23	35.5166	74.3065	2687	North East	19	Chilgoza	Pinus gerardiana	28
Thore Range	Dense Pure Conifer	`1	35.3988	73.7691	2440	East	1	Deodar	Cedrus Deodara	40.35
Thore Range	Dense Pure Conifer	1	35.3988	73.7691	2440	East	2	Deodar	Cedrus Deodara	59.22
Thore Range	Dense Pure Conifer	1	35.3988	73.7691	2440	East	3	Deodar	Cedrus Deodara	79.6561
Thore Range	Dense Pure Conifer	1	35.3988	73.7691	2440	East	4	Deodar	Cedrus Deodara	60.242
Thore Range	Dense Pure Conifer	1	35.3988	73.7691	2440	East	5	Deodar	Cedrus Deodara	59.242
Chilas Head Quater Range	Dense Pure Conifer	1	35.3988	73.7691	2440	East	6	Deodar	Cedrus Deodara	68.0076
Chilas Head Quater Range	Dense Pure Conifer	1	35.3988	73.7691	2440	East	7	Deodar	Cedrus Deodara	52.535
Chilas Head Quater Range	Dense Pure Conifer	1	35.3988	73.7691	2440	East	8	Deodar	Cedrus Deodara	33.121
Chilas Head Quater Range	Dense Pure Conifer	1	35.3988	73.7691	2440	East	9	Deodar	Cedrus Deodara	79.6561
Chilas Head Quater Range	Dense Pure Conifer	1	35.3988	73.7691	2440	East	10	Deodar	Cedrus Deodara	78.6268
Chilas Head Quater Range	Dense Pure Conifer	1	35.3988	73.7691	2440	East	11	Deodar	Cedrus Deodara	89.3631
Chilas Head Quater Range	Dense Pure Conifer	1	35.3988	73.7691	2440	East	12	Deodar	Cedrus Deodara	21.5312
Chilas Head Quater Range	Dense Pure Conifer	1	35.3988	73.7691	2440	East	13	Deodar	Cedrus Deodara	18.5605
Chilas Head Quater Range	Dense Pure Conifer	1	35.3988	73.7691	2440	East	14	Deodar	Cedrus Deodara	82.6561
Chilas Head Quater Range	Dense Pure Conifer	1	35.3988	73.7691	2440	East	16	Deodar	Cedrus Deodara	24.2675
Chilas Head Quater Range	Dense Pure Conifer	1	35.3988	73.7691	2440	East	17	Deodar	Cedrus Deodara	24.2675
Chilas Head Quater Range	Dense Pure Conifer	1	35.3988	73.7691	2440	East	18	Deodar	Cedrus Deodara	16.5019
Chilas Head Quater Range	Dense Pure Conifer	1	35.3988	73.7691	2440	East	19	Deodar	Cedrus Deodara	87.3631
Chilas Head Quater Range	Dense Pure Conifer	2	35.3988	73.7691	2440	East	1	Deodar	Cedrus Deodara	44.7694
Chilas Head Quater Range	Dense Pure Conifer	2	35.3988	73.7691	2440	East	2	Deodar	Cedrus Deodara	35.3745
Chilas Head Quater Range	Dense Pure Conifer	2	35.3988	73.7691	2440	East	3	Deodar	Cedrus Deodara	55.3299
Chilas Head Quater Range	Dense Pure Conifer	2	35.3988	73.7691	2440	East	4	Deodar	Cedrus Deodara	49.535
Chilas Head Quater Range	Dense Mix Forests	2	35.4034	73.7678	2348	North	5	Deodar	Cedrus Deodara	58.9592
Chilas Head Quater Range	Dense Mix Forests	2	35.4034	73.7678	2348	North	13	Deodar	Cedrus Deodara	26.2089
Chilas Head Quater Range	Dense Mix Forests	2	35.4034	73.7678	2348	North	14	Deodar	Cedrus Deodara	47.5643
Chilas Head Quater Range	Dense Mix Forests	2	35.4034	73.7678	2348	North	15	Deodar	Cedrus Deodara	28.1503
Chilas Head Quater Range	Dense Mix Forests	2	35.4034	73.7678	2348	North	18	Deodar	Cedrus Deodara	30.0917
Chilas Head Quater Range	Dense Mix Forests	2	35.4034	73.7678	2348	North	23	Deodar	Cedrus Deodara	32.0331
Chilas Head Quater Range	Dense Mix Forests	3	35.4034	73.7678	2348	North	4	Deodar	Cedrus Deodara	32.0331
Chilas Head Quater Range	Dense Mix Forests	3	35.4034	73.7678	2348	North	5	Deodar	Cedrus Deodara	37.8573
Chilas Head Quater Range	Dense Mix Forests	3	35.4034	73.7678	2348	North	6	Deodar	Cedrus Deodara	34.9452
Gunar Range	Dense Mix Forests	3	35.4034	73.7678	2348	North	10	Deodar	Cedrus Deodara	33.9745
Gunar Range	Dense Mix Forests	3	35.4034	73.7678	2348	North	16	Deodar	Cedrus Deodara	49.5057
Gunar Range	Dense Mix Forests	3	35.4034	73.7678	2348	North	17	Deodar	Cedrus Deodara	49.5643
Gunar Range	Dense Mix Forests	3	35.4034	73.7678	2348	North	18	Deodar	Cedrus Deodara	31.0624
Gunar Range	Dense Pure Conifer	3	35.3933	73.7703	2589	North East	21	Deodar	Cedrus Deodara	56.3006
Gunar Range	Dense Pure Conifer	3	35.3933	73.7703	2589	North East	22	Deodar	Cedrus Deodara	66.0076
Gunar Range	Dense Pure Conifer	4	35.3933	73.7703	2589	North East	2	Deodar	Cedrus Deodara	21.3554
Gunar Range	Dense Pure Conifer	4	35.3933	73.7703	2589	North East	3	Deodar	Cedrus Deodara	65.0369
Gunar Range	Dense Pure Conifer	4	35.3933	73.7703	2589	North East	4	Deodar	Cedrus Deodara	35.9159
Gunar Range	Dense Pure Conifer	4	35.3933	73.7703	2589	North East	6	Deodar	Cedrus Deodara	49.6028
Gunar Range	Dense Pure Conifer	4	35.3933	73.7703	2589	North East	7	Deodar	Cedrus Deodara	39.8958
Gunar Range	Dense Pure Conifer	4	35.3933	73.7703	2589	North East	8	Deodar	Cedrus Deodara	54.3592
Gunar Range	Dense Pure Conifer	4	35.3933	73.7703	2589	North East	9	Deodar	Cedrus Deodara	61.242
Gunar Range	Dense Pure Conifer	4	35.3933	73.7703	2589	North East	10	Deodar	Cedrus Deodara	85.4217
Gunar Range	Dense Pure Conifer	4	35.3933	73.7703	2589	North East	12	Deodar	Cedrus Deodara	27.1796
Gunar Range	Dense Pure Conifer	4	35.3933	73.7703	2589	North East	13	Deodar	Cedrus Deodara	46.5936
Gunar Range	Dense Pure Conifer	4	35.3933	73.7703	2589	North East	14	Deodar	Cedrus Deodara	39.8958
Gunar Range	Dense Pure Conifer	4	35.3933	73.7703	2589	North East	15	Deodar	Cedrus Deodara	7.28025
Gunar Range	Dense Pure Conifer	4	35.3933	73.7703	2589	North East	16	Deodar	Cedrus Deodara	77.6561
Thak Niat Babusar Range	Dense Pure Conifer	4	35.3933	73.7703	2589	North East	17	Deodar	Cedrus Deodara	97.0701
Thak Niat Babusar Range	Dense Pure Conifer	4	35.3933	73.7703	2589	North East	18	Deodar	Cedrus Deodara	32.0331
Chilas Head Quater Range	Sparse Pure Conifer	5	35.2736	73.9556	2763	South	1	Deodar	Cedrus Deodara	16.5019
Chilas Head Quater Range	Sparse Pure Conifer	5	35.2736	73.9556	2763	South	9	Deodar	Cedrus Deodara	9.70701
Chilas Head Quater Range	Sparse Pure Conifer	5	35.2736	73.9556	2763	South	13	Deodar	Cedrus Deodara	8.05682
Chilas Head Quater Range	Sparse Pure Conifer	6	35.2736	73.9556	2763	South	2	Deodar	Cedrus Deodara	10.6777
Chilas Head Quater Range	Sparse Pure Conifer	6	35.2736	73.9556	2763	South	6	Deodar	Cedrus Deodara	15.5312
Chilas Head Quater Range	Sparse Pure Conifer	6	35.2736	73.9556	2763	South	9	Deodar	Cedrus Deodara	6.40662
Chilas Head Quater Range	Sparse Pure Conifer	6	35.2736	73.9556	2763	South	10	Deodar	Cedrus Deodara	8.83338
Chilas Head Quater Range	Sparse Pure Conifer	6	35.2736	73.9556	2763	South	11	Deodar	Cedrus Deodara	11.2601
Chilas Head Quater Range	Dense Pure Conifer	9	35.3755	73.8882	2652	South West	3	Deodar	Cedrus Deodara	106
Chilas Head Quater Range	Dense Pure Conifer	9	35.3755	73.8882	2652	South West	4	Deodar	Cedrus Deodara	127
Chilas Head Quater Range	Dense Pure Conifer	9	35.3755	73.8882	2652	South West	5	Deodar	Cedrus Deodara	79
Chilas Head Quater Range	Dense Pure Conifer	9	35.3755	73.8882	2652	South West	6	Deodar	Cedrus Deodara	43
Chilas Head Quater Range	Dense Pure Conifer	9	35.3755	73.8882	2652	South West	7	Deodar	Cedrus Deodara	48
Chilas Head Quater Range	Dense Pure Conifer	9	35.3755	73.8882	2652	South West	8	Deodar	Cedrus Deodara	66
Chilas Head Quater Range	Dense Pure Conifer	9	35.3755	73.8882	2652	South West	9	Deodar	Cedrus Deodara	84
Chilas Head Quater Range	Dense Pure Conifer	9	35.3755	73.8882	2652	South West	10	Deodar	Cedrus Deodara	66
Chilas Head Quater Range	Dense Pure Conifer	9	35.3765	73.8899	2585	South	11	Deodar	Cedrus Deodara	66
Chilas Head Quater Range	Dense Pure Conifer	9	35.3765	73.8899	2585	South	12	Deodar	Cedrus Deodara	61
Chilas Head Quater Range	Dense Pure Conifer	9	35.3765	73.8899	2585	South	13	Deodar	Cedrus Deodara	64
Chilas Head Quater Range	Dense Pure Conifer	9	35.3765	73.8899	2585	South	14	Deodar	Cedrus Deodara	67.7
Chilas Head Quater Range	Dense Pure Conifer	9	35.3765	73.8899	2585	South	15	Deodar	Cedrus Deodara	56.5
Thak Niat Babusar Range	Dense Pure Conifer	9	35.3765	73.8899	2585	South	16	Deodar	Cedrus Deodara	47.7
Thak Niat Babusar Range	Dense Pure Conifer	9	35.3765	73.8899	2585	South	17	Deodar	Cedrus Deodara	47
Thak Niat Babusar Range	Dense Pure Conifer	9	35.3765	73.8899	2585	South	18	Deodar	Cedrus Deodara	65
Thak Niat Babusar Range	Dense Pure Conifer	9	35.3765	73.8899	2585	South	19	Deodar	Cedrus Deodara	50.7
Thak Niat Babusar Range	Dense Pure Conifer	9	35.3765	73.8899	2585	South	20	Deodar	Cedrus Deodara	41.7
Thak Niat Babusar Range	Dense Pure Conifer	9	35.3765	73.8899	2585	South	21	Deodar	Cedrus Deodara	64.8
Thak Niat Babusar Range	Dense Pure Conifer	10	35.3698	73.9002	2916	North	2	Deodar	Cedrus Deodara	83
Thak Niat Babusar Range	Dense Pure Conifer	10	35.3731	73.8932	2733	North	8	Deodar	Cedrus Deodara	85
Thak Niat Babusar Range	Dense Pure Conifer	10	35.3731	73.8932	2733	North	9	Deodar	Cedrus Deodara	50
Thak Niat Babusar Range	Dense Pure Conifer	10	35.3731	73.8932	2733	North	10	Deodar	Cedrus Deodara	44
Thak Niat Babusar Range	Dense Pure Conifer	10	35.3731	73.8932	2733	North	11	Deodar	Cedrus Deodara	38
Thak Niat Babusar Range	Dense Pure Conifer	10	35.3731	73.8932	2733	North	12	Deodar	Cedrus Deodara	40
Thak Niat Babusar Range	Dense Pure Conifer	10	35.3731	73.8932	2733	North	13	Deodar	Cedrus Deodara	41
Thak Niat Babusar Range	Dense Pure Conifer	10	35.3731	73.8932	2733	North	14	Deodar	Cedrus Deodara	72
Thak Niat Babusar Range	Dense Pure Conifer	10	35.3731	73.8932	2733	North	15	Deodar	Cedrus Deodara	45
Thak Niat Babusar Range	Dense Pure Conifer	10	35.3731	73.8932	2733	North	16	Deodar	Cedrus Deodara	36
Thak Niat Babusar Range	Dense Pure Conifer	10	35.3731	73.8932	2733	North	17	Deodar	Cedrus Deodara	59
Thak Niat Babusar Range	Dense Pure Conifer	10	35.3731	73.8932	2733	North	18	Deodar	Cedrus Deodara	100
Thak Niat Babusar Range	Dense Pure Conifer	10	35.3731	73.8932	2733	North	19	Deodar	Cedrus Deodara	90
Thak Niat Babusar Range	Dense Pure Conifer	10	35.3731	73.8932	2733	North	20	Deodar	Cedrus Deodara	38
Thak Niat Babusar Range	Dense Pure Conifer	10	35.3731	73.8932	2733	North	21	Deodar	Cedrus Deodara	37.5
Thak Niat Babusar Range	Dense Pure Conifer	10	35.3731	73.8932	2733	North	22	Deodar	Cedrus Deodara	37
Thak Niat Babusar Range	Dense Pure Conifer	10	35.3607	73.7609	2399	South	23	Deodar	Cedrus Deodara	72
Thak Niat Babusar Range	Dense Pure Conifer	10	35.3607	73.7609	2399	South	24	Deodar	Cedrus Deodara	35
Thak Niat Babusar Range	Dense Pure Conifer	10	35.3607	73.7609	2399	South	25	Deodar	Cedrus Deodara	23
Thak Niat Babusar Range	Dense Pure Conifer	10	35.3607	73.7609	2399	South	26	Deodar	Cedrus Deodara	48
Thak Niat Babusar Range	Dense Pure Conifer	10	35.3607	73.7609	2399	South	27	Deodar	Cedrus Deodara	60
Thak Niat Babusar Range	Dense Pure Conifer	11	35.3607	73.7609	2399	South	1	Deodar	Cedrus Deodara	48.3
Thak Niat Babusar Range	Dense Pure Conifer	11	35.3607	73.7609	2399	South	2	Deodar	Cedrus Deodara	20
Thak Niat Babusar Range	Dense Pure Conifer	11	35.3607	73.7609	2399	South	3	Deodar	Cedrus Deodara	30.5
Thak Niat Babusar Range	Dense Pure Conifer	11	35.3607	73.7609	2399	South	4	Deodar	Cedrus Deodara	39
Thore Range	Dense Pure Conifer	11	35.3607	73.7609	2399	South	5	Deodar	Cedrus Deodara	51.7
Chilas Head Quater Range	Dense Pure Conifer	11	35.3592	73.76	2490	South East	9	Deodar	Cedrus Deodara	46
Chilas Head Quater Range	Dense Pure Conifer	11	35.3592	73.76	2490	South East	10	Deodar	Cedrus Deodara	13
Thore Range	Dense Pure Conifer	11	35.3592	73.76	2490	South East	11	Deodar	Cedrus Deodara	17
Thore Range	Dense Pure Conifer	11	35.3592	73.76	2490	South East	12	Deodar	Cedrus Deodara	68
Thore Range	Dense Pure Conifer	11	35.3592	73.76	2490	South East	13	Deodar	Cedrus Deodara	19
Thore Range	Dense Pure Conifer	11	35.3592	73.76	2490	South East	14	Deodar	Cedrus Deodara	45
Thore Range	Dense Pure Conifer	11	35.3592	73.76	2490	South East	15	Deodar	Cedrus Deodara	16
Thore Range	Dense Pure Conifer	11	35.3592	73.76	2490	South East	16	Deodar	Cedrus Deodara	60
Thore Range	Dense Pure Conifer	11	35.3592	73.76	2490	South East	17	Deodar	Cedrus Deodara	70
Thore Range	Dense Pure Conifer	11	35.3592	73.76	2490	South East	18	Deodar	Cedrus Deodara	46
Thore Range	Dense Pure Conifer	11	35.3592	73.76	2490	South East	19	Deodar	Cedrus Deodara	21
Thore Range	Dense Pure Conifer	11	35.3592	73.76	2490	South East	20	Deodar	Cedrus Deodara	56
Thore Range	Dense Pure Conifer	11	35.3592	73.76	2490	South East	22	Deodar	Cedrus Deodara	82
Thore Range	Dense Pure Conifer	11	35.3582	73.7614	2544	South	23	Deodar	Cedrus Deodara	64
Thore Range	Dense Pure Conifer	11	35.3582	73.7614	2544	South	24	Deodar	Cedrus Deodara	44
Thore Range	Dense Pure Conifer	12	35.3582	73.7614	2544	South	1	Deodar	Cedrus Deodara	30
Thore Range	Dense Pure Conifer	12	35.3582	73.7614	2544	South	2	Deodar	Cedrus Deodara	42
Thore Range	Dense Pure Conifer	12	35.3582	73.7614	2544	South	3	Deodar	Cedrus Deodara	28
Thore Range	Dense Pure Conifer	12	35.3582	73.7614	2544	South	4	Deodar	Cedrus Deodara	24
Thore Range	Dense Pure Conifer	12	35.3582	73.7614	2544	South	5	Deodar	Cedrus Deodara	26
Thore Range	Dense Pure Conifer	12	35.3582	73.7614	2544	South	6	Deodar	Cedrus Deodara	48
Thore Range	Dense Pure Conifer	12	35.3582	73.7614	2544	South	7	Deodar	Cedrus Deodara	20
Thore Range	Dense Pure Conifer	12	35.3582	73.7614	2544	South	8	Deodar	Cedrus Deodara	18
Thore Range	Dense Pure Conifer	12	35.3582	73.7614	2544	South	9	Deodar	Cedrus Deodara	35
Thore Range	Dense Pure Conifer	12	35.3582	73.7614	2544	South	10	Deodar	Cedrus Deodara	38
Thore Range	Dense Pure Conifer	12	35.3582	73.7614	2544	South	11	Deodar	Cedrus Deodara	27
Thore Range	Dense Pure Conifer	12	35.3582	73.7614	2544	South	12	Deodar	Cedrus Deodara	21
Thore Range	Dense Pure Conifer	12	35.3659	73.7527	2497	North East	13	Deodar	Cedrus Deodara	62
Thore Range	Dense Pure Conifer	12	35.3659	73.7527	2497	North East	14	Deodar	Cedrus Deodara	75
Thore Range	Dense Pure Conifer	12	35.3659	73.7527	2497	North East	15	Deodar	Cedrus Deodara	35
Thore Range	Dense Pure Conifer	12	35.3659	73.7527	2497	North East	16	Deodar	Cedrus Deodara	35
Thore Range	Dense Pure Conifer	12	35.3659	73.7527	2497	North East	17	Deodar	Cedrus Deodara	45
Thore Range	Dense Pure Conifer	12	35.3659	73.7527	2497	North East	18	Deodar	Cedrus Deodara	75
Thore Range	Dense Pure Conifer	12	35.3659	73.7527	2497	North East	19	Deodar	Cedrus Deodara	59
Thore Range	Dense Pure Conifer	12	35.3659	73.7527	2497	North East	20	Deodar	Cedrus Deodara	65
Thore Range	Dense Pure Conifer	12	35.3659	73.7527	2497	North East	21	Deodar	Cedrus Deodara	45
Thore Range	Dense Pure Conifer	12	35.3659	73.7527	2497	North East	22	Deodar	Cedrus Deodara	35
Thore Range	Dense Pure Conifer	12	35.3659	73.7527	2497	North East	23	Deodar	Cedrus Deodara	20
Thore Range	Dense Pure Conifer	12	35.3659	73.7527	2497	North East	24	Deodar	Cedrus Deodara	23
Thore Range	Dense Pure Conifer	12	35.3659	73.7527	2497	North East	25	Deodar	Cedrus Deodara	45
Thore Range	Sparse Pure Conifer	13	35.3627	73.7573	2439	South East	1	Deodar	Cedrus Deodara	114
Thore Range	Sparse Pure Conifer	13	35.3627	73.7573	2439	South East	2	Deodar	Cedrus Deodara	102
Thore Range	Sparse Pure Conifer	13	35.3627	73.7573	2439	South East	3	Deodar	Cedrus Deodara	105
Thore Range	Sparse Pure Conifer	13	35.3627	73.7573	2439	South East	4	Deodar	Cedrus Deodara	53
Thore Range	Sparse Pure Conifer	13	35.3627	73.7573	2439	South East	5	Deodar	Cedrus Deodara	74
Thore Range	Sparse Pure Conifer	13	35.3627	73.7573	2439	South East	6	Deodar	Cedrus Deodara	86
Thore Range	Sparse Pure Conifer	13	35.3627	73.7573	2439	South East	7	Deodar	Cedrus Deodara	51
Thore Range	Sparse Pure Conifer	13	35.3627	73.7573	2439	South East	8	Deodar	Cedrus Deodara	74
Thore Range	Dense Pure Conifer	16	35.5242	74.304	2763	South	14	Deodar	Cedrus Deodara	56
Thore Range	Dense Pure Conifer	16	35.5242	74.304	2763	South	15	Deodar	Cedrus Deodara	66
Thore Range	Dense Pure Conifer	17	35.5242	74.304	2763	South	1	Deodar	Cedrus Deodara	62
Thore Range	Dense Pure Conifer	17	35.5242	74.304	2763	South	2	Deodar	Cedrus Deodara	46
Thore Range	Dense Pure Conifer	17	35.5242	74.304	2763	South	3	Deodar	Cedrus Deodara	65
Thore Range	Dense Pure Conifer	17	35.5242	74.304	2763	South	12	Deodar	Cedrus Deodara	65.5
Thore Range	Dense Pure Conifer	17	35.5242	74.304	2763	South	13	Deodar	Cedrus Deodara	94
Thore Range	Dense Pure Conifer	17	35.5242	74.304	2763	South	16	Deodar	Cedrus Deodara	56
Thore Range	Dense Pure Conifer	31	35.5327	74.3056	2743	North West	12	Deodar	Cedrus Deodara	25
Thore Range	Dense Pure Conifer	31	35.5327	74.3056	2743	North West	13	Deodar	Cedrus Deodara	20
Thore Range	Dense Pure Conifer	31	35.5327	74.3056	2743	North West	15	Deodar	Cedrus Deodara	19
Thore Range	Dense Pure Conifer	31	35.5327	74.3056	2743	North West	16	Deodar	Cedrus Deodara	15
Thore Range	Dense Pure Conifer	31	35.5327	74.3056	2743	North West	22	Deodar	Cedrus Deodara	81
Thore Range	Sparse Pure Conifer	18	35.5329	74.307	2817	South West	2	Fir	Abies Pindrow	66
Thore Range	Sparse Pure Conifer	18	35.5329	74.307	2817	South West	3	Fir	Abies Pindrow	67
Thore Range	Sparse Pure Conifer	18	35.5329	74.307	2817	South West	5	Fir	Abies Pindrow	29.5
Thore Range	Sparse Pure Conifer	18	35.5329	74.307	2817	South West	8	Fir	Abies Pindrow	33
Thore Range	Sparse Pure Conifer	18	35.5329	74.307	2817	South West	9	Fir	Abies Pindrow	50
Thore Range	Sparse Pure Conifer	18	35.5329	74.307	2817	South West	10	Fir	Abies Pindrow	35
Thore Range	Sparse Pure Conifer	19	35.5329	74.307	2817	South West	5	Fir	Abies Pindrow	14
Thore Range	Sparse Pure Conifer	19	35.5329	74.307	2817	South West	6	Fir	Abies Pindrow	19
Thore Range	Sparse Pure Conifer	5	35.2736	73.9556	2763	South	10	Juniper	Juniperous Spp.	15.5312
Thore Range	Sparse Pure Conifer	6	35.2736	73.9556	2763	South	7	Juniper	Juniperous Spp.	49.5057
Thore Range	Dense Pure Conifer	8	35.5581	74.5122	3021	South East	10	Juniper	Juniperous Spp.	45.6229
Thore Range	Dense Pure Conifer	8	35.5581	74.5122	3021	South East	14	Juniper	Juniperous Spp.	27.1796
Thore Range	Dense Pure Conifer	8	35.5581	74.5122	3021	South East	20	Juniper	Juniperous Spp.	16.5019
Thore Range	Dense Pure Conifer	8	35.5581	74.5122	3021	South East	22	Juniper	Juniperous Spp.	20.3847
Thore Range	Dense Pure Conifer	8	35.5581	74.5122	3021	South East	1	Juniper	Juniperous Spp.	19.414
Thore Range	Dense Pure Conifer	8	35.5581	74.5122	3021	South East	2	Juniper	Juniperous Spp.	39.7987
Thore Range	Dense Pure Conifer	16	35.5242	74.304	2763	South	13	Juniper	Juniperous Spp.	25
Thore Range	Dense Pure Conifer	16	35.5242	74.304	2763	South	16	Juniper	Juniperous Spp.	36
Thore Range	Dense Pure Conifer	16	35.5242	74.304	2763	South	17	Juniper	Juniperous Spp.	16
Thore Range	Dense Pure Conifer	16	35.5242	74.304	2763	South	18	Juniper	Juniperous Spp.	15
Thore Range	Dense Pure Conifer	16	35.5242	74.304	2763	South	19	Juniper	Juniperous Spp.	12
Thore Range	Dense Pure Conifer	16	35.5242	74.304	2763	South	20	Juniper	Juniperous Spp.	13
Thore Range	Dense Pure Conifer	16	35.5242	74.304	2763	South	21	Juniper	Juniperous Spp.	18
Thore Range	Dense Pure Conifer	16	35.5242	74.304	2763	South	22	Juniper	Juniperous Spp.	33
Thore Range	Dense Pure Conifer	16	35.5242	74.304	2763	South	23	Juniper	Juniperous Spp.	11
Thore Range	Dense Pure Conifer	16	35.5242	74.304	2763	South	24	Juniper	Juniperous Spp.	32
Thore Range	Dense Pure Conifer	17	35.5242	74.304	2763	South	4	Juniper	Juniperous Spp.	15
Thore Range	Dense Pure Conifer	17	35.5242	74.304	2763	South	5	Juniper	Juniperous Spp.	12
Thore Range	Dense Pure Conifer	17	35.5242	74.304	2763	South	6	Juniper	Juniperous Spp.	34
Thore Range	Dense Pure Conifer	17	35.5242	74.304	2763	South	7	Juniper	Juniperous Spp.	7
Thore Range	Dense Pure Conifer	17	35.5242	74.304	2763	South	8	Juniper	Juniperous Spp.	5
Thore Range	Dense Pure Conifer	17	35.5242	74.304	2763	South	10	Juniper	Juniperous Spp.	15
Thore Range	Dense Pure Conifer	17	35.5242	74.304	2763	South	11	Juniper	Juniperous Spp.	12
Thore Range	Dense Pure Conifer	17	35.5242	74.304	2763	South	14	Juniper	Juniperous Spp.	19
Thore Range	Dense Pure Conifer	17	35.5242	74.304	2763	South	15	Juniper	Juniperous Spp.	14
Thore Range	Sparse Mix Forests	20	35.5166	74.3065	2687	North East	7	Juniper	Juniperous Spp.	11
Thore Range	Sparse Mix Forests	23	35.5166	74.3065	2687	North East	6	Juniper	Juniperous Spp.	11
Thore Range	Sparse Mix Forests	23	35.5166	74.3065	2687	North East	11	Juniper	Juniperous Spp.	34
Thore Range	Sparse Mix Forests	23	35.5166	74.3065	2687	North East	14	Juniper	Juniperous Spp.	24
Thore Range	Dense Pure Conifer	34	35.5408	74.3008	2987	South East	17	Juniper	Juniperous Spp.	13
Thore Range	Dense Pure Conifer	34	35.5408	74.3008	2987	South East	20	Juniper	Juniperous Spp.	13
Thore Range	Dense Pure Conifer	34	35.5408	74.3008	2987	South East	24	Juniper	Juniperous Spp.	9
Thore Range	Dense Pure Conifer	34	35.5408	74.3008	2987	South East	25	Juniper	Juniperous Spp.	10
Thore Range	Dense Pure Conifer	35	35.5434	74.3024	3090	South East	10	Juniper	Juniperous Spp.	17
Thore Range	Dense Pure Conifer	35	35.5434	74.3024	3090	South East	14	Juniper	Juniperous Spp.	14
Thore Range	Dense Pure Conifer	36	35.5434	74.3024	3090	South East	3	Juniper	Juniperous Spp.	19
Thore Range	Dense Pure Conifer	36	35.5434	74.3024	3090	South East	7	Juniper	Juniperous Spp.	22
Thore Range	Dense Pure Conifer	36	35.5434	74.3024	3090	South East	8	Juniper	Juniperous Spp.	17
Thore Range	Dense Pure Conifer	36	35.5434	74.3024	3090	South East	15	Juniper	Juniperous Spp.	22
Thore Range	Dense Pure Conifer	1	35.3988	73.7691	2440	East	15	Kail	Pinus wallichiana	19.5019
Thore Range	Dense Pure Conifer	4	35.3933	73.7703	2589	North East	11	Kail	Pinus wallichiana	12.6191
Thore Range	Sparse Pure Conifer	5	35.2736	73.9556	2763	South	2	Kail	Pinus wallichiana	22.3261
Thore Range	Sparse Pure Conifer	5	35.2736	73.9556	2763	South	3	Kail	Pinus wallichiana	24.2675
Thore Range	Sparse Pure Conifer	5	35.2736	73.9556	2763	South	8	Kail	Pinus wallichiana	8.05682
Thore Range	Sparse Pure Conifer	5	35.2736	73.9556	2763	South	11	Kail	Pinus wallichiana	8.05682
Thore Range	Dense Pure Conifer	8	35.5581	74.5122	3021	South East	21	Kail	Pinus wallichiana	81.5389
Thore Range	Dense Mix Forests	14	35.54	74.31	2763	South	1	Kail	Pinus wallichiana	13
Thore Range	Dense Mix Forests	14	35.54	74.31	2763	South	4	Kail	Pinus wallichiana	52
Thore Range	Dense Mix Forests	14	35.54	74.31	2763	South	11	Kail	Pinus wallichiana	13
Thore Range	Dense Mix Forests	14	35.54	74.31	2763	South	12	Kail	Pinus wallichiana	15
Thore Range	Dense Mix Forests	14	35.54	74.31	2763	South	19	Kail	Pinus wallichiana	31
Thore Range	Dense Mix Forests	14	35.54	74.31	2763	South	24	Kail	Pinus wallichiana	38
Thore Range	Dense Mix Forests	14	35.54	74.31	2763	South	25	Kail	Pinus wallichiana	21
Thore Range	Dense Mix Forests	14	35.54	74.31	2763	South	26	Kail	Pinus wallichiana	43
Thore Range	Dense Mix Forests	14	35.54	74.31	2763	South	27	Kail	Pinus wallichiana	44
Chilas Head Quater Range	Dense Mix Forests	14	35.54	74.31	2763	South	28	Kail	Pinus wallichiana	38
Chilas Head Quater Range	Dense Mix Forests	14	35.54	74.31	2763	South	29	Kail	Pinus wallichiana	14
Chilas Head Quater Range	Dense Mix Forests	15	35.54	74.31	2763	South	11	Kail	Pinus wallichiana	20
Chilas Head Quater Range	Dense Mix Forests	15	35.54	74.31	2763	South	12	Kail	Pinus wallichiana	39
Chilas Head Quater Range	Dense Mix Forests	15	35.54	74.31	2763	South	13	Kail	Pinus wallichiana	13.5
Chilas Head Quater Range	Dense Mix Forests	15	35.54	74.31	2763	South	14	Kail	Pinus wallichiana	31
Chilas Head Quater Range	Dense Mix Forests	15	35.54	74.31	2763	South	17	Kail	Pinus wallichiana	32
Chilas Head Quater Range	Dense Mix Forests	15	35.54	74.31	2763	South	18	Kail	Pinus wallichiana	19
Gunar Range	Dense Mix Forests	15	35.54	74.31	2763	South	19	Kail	Pinus wallichiana	17
Gunar Range	Dense Mix Forests	15	35.54	74.31	2763	South	20	Kail	Pinus wallichiana	17
Gunar Range	Dense Mix Forests	15	35.54	74.31	2763	South	21	Kail	Pinus wallichiana	49
Gunar Range	Dense Mix Forests	15	35.54	74.31	2763	South	22	Kail	Pinus wallichiana	14
Gunar Range	Dense Mix Forests	15	35.54	74.31	2763	South	23	Kail	Pinus wallichiana	33
Thak Niat Babusar Range	Dense Mix Forests	15	35.54	74.31	2763	South	24	Kail	Pinus wallichiana	45
Thak Niat Babusar Range	Dense Mix Forests	15	35.54	74.31	2763	South	25	Kail	Pinus wallichiana	41
Thak Niat Babusar Range	Dense Mix Forests	15	35.54	74.31	2763	South	26	Kail	Pinus wallichiana	43
Thak Niat Babusar Range	Sparse Pure Conifer	18	35.5329	74.307	2763	South West	1	Kail	Pinus wallichiana	90
Thak Niat Babusar Range	Sparse Pure Conifer	18	35.5329	74.307	2817	South West	4	Kail	Pinus wallichiana	56
Thak Niat Babusar Range	Sparse Pure Conifer	18	35.5329	74.307	2817	South West	6	Kail	Pinus wallichiana	41
Chilas Head Quater Range	Sparse Pure Conifer	18	35.5329	74.307	2817	South West	7	Kail	Pinus wallichiana	35
Chilas Head Quater Range	Sparse Pure Conifer	18	35.5329	74.307	2817	South West	12	Kail	Pinus wallichiana	64
Chilas Head Quater Range	Sparse Pure Conifer	18	35.5329	74.307	2817	South West	13	Kail	Pinus wallichiana	50
Chilas Head Quater Range	Sparse Pure Conifer	18	35.5329	74.307	2817	South West	14	Kail	Pinus wallichiana	51.5
Chilas Head Quater Range	Sparse Pure Conifer	19	35.5329	74.307	2817	South West	2	Kail	Pinus wallichiana	35
Chilas Head Quater Range	Sparse Pure Conifer	19	35.5329	74.307	2817	South West	7	Kail	Pinus wallichiana	17
Chilas Head Quater Range	Dense Mix Forests	24	35.5356	74.308	2887	South West	1	Kail	Pinus wallichiana	24
Chilas Head Quater Range	Dense Mix Forests	24	35.5356	74.308	2887	South West	8	Kail	Pinus wallichiana	12
Chilas Head Quater Range	Dense Mix Forests	25	35.5356	74.308	2887	South West	4	Kail	Pinus wallichiana	53
Chilas Head Quater Range	Dense Mix Forests	25	35.5356	74.308	2887	South West	6	Kail	Pinus wallichiana	65
Chilas Head Quater Range	Dense Pure Conifer	26	35.5489	74.303	3051	South West	17	Kail	Pinus wallichiana	30
Chilas Head Quater Range	Dense Pure Conifer	26	35.5489	74.303	3051	South West	18	Kail	Pinus wallichiana	20
Chilas Head Quater Range	Dense Pure Conifer	27	35.5489	74.303	3051	South West	4	Kail	Pinus wallichiana	19
Chilas Head Quater Range	Dense Pure Conifer	27	35.5489	74.303	3051	South West	6	Kail	Pinus wallichiana	49
Chilas Head Quater Range	Dense Pure Conifer	27	35.5489	74.303	3051	South West	10	Kail	Pinus wallichiana	48
Chilas Head Quater Range	Dense Pure Conifer	27	35.5489	74.303	3051	South West	13	Kail	Pinus wallichiana	37
Chilas Head Quater Range	Dense Pure Conifer	27	35.5489	74.303	3051	South West	14	Kail	Pinus wallichiana	18
Chilas Head Quater Range	Dense Pure Conifer	27	35.5489	74.303	3051	South West	15	Kail	Pinus wallichiana	33
Chilas Head Quater Range	Dense Pure Conifer	27	35.5489	74.303	3051	South West	16	Kail	Pinus wallichiana	19
Thak Niat Babusar Range	Dense Pure Conifer	27	35.5489	74.303	3051	South West	17	Kail	Pinus wallichiana	16
Thak Niat Babusar Range	Dense Pure Conifer	27	35.5489	74.303	3051	South West	19	Kail	Pinus wallichiana	30
Thak Niat Babusar Range	Dense Pure Conifer	27	35.5489	74.303	3051	South West	20	Kail	Pinus wallichiana	44
Thak Niat Babusar Range	Dense Pure Conifer	27	35.5489	74.303	3051	South West	22	Kail	Pinus wallichiana	21
Thak Niat Babusar Range	Dense Pure Conifer	27	35.5489	74.303	3051	South West	23	Kail	Pinus wallichiana	24
Thak Niat Babusar Range	Dense Pure Conifer	27	35.5489	74.303	3051	South West	27	Kail	Pinus wallichiana	78
Thak Niat Babusar Range	Dense Pure Conifer	27	35.5489	74.303	3051	South West	28	Kail	Pinus wallichiana	14
Thak Niat Babusar Range	Dense Pure Conifer	27	35.5489	74.303	3051	South West	29	Kail	Pinus wallichiana	34
Thak Niat Babusar Range	Dense Pure Conifer	28	35.5489	74.303	3051	South West	1	Kail	Pinus wallichiana	24
Thak Niat Babusar Range	Dense Pure Conifer	28	35.5489	74.303	3051	South West	2	Kail	Pinus wallichiana	19
Thore Range	Dense Pure Conifer	28	35.5489	74.303	3051	South West	3	Kail	Pinus wallichiana	44
Thore Range	Dense Pure Conifer	28	35.5489	74.303	3051	South West	4	Kail	Pinus wallichiana	39
Thak Niat Babusar Range	Dense Pure Conifer	28	35.5607	74.3033	3058	West	9	Kail	Pinus wallichiana	14
Thak Niat Babusar Range	Dense Pure Conifer	28	35.5607	74.3033	3058	West	10	Kail	Pinus wallichiana	28
Thak Niat Babusar Range	Dense Pure Conifer	28	35.5607	74.3033	3058	West	14	Kail	Pinus wallichiana	20
Gunar Range	Dense Pure Conifer	28	35.5607	74.3033	3058	West	15	Kail	Pinus wallichiana	19
Gunar Range	Dense Pure Conifer	28	35.5607	74.3033	3058	West	16	Kail	Pinus wallichiana	55
Gunar Range	Dense Pure Conifer	28	35.5607	74.3033	3058	West	30	Kail	Pinus wallichiana	51
Gunar Range	Dense Pure Conifer	28	35.5607	74.3033	3058	West	32	Kail	Pinus wallichiana	19
Gunar Range	Dense Pure Conifer	28	35.5607	74.3033	3058	West	35	Kail	Pinus wallichiana	29
Gunar Range	Dense Pure Conifer	29	35.5607	74.3033	3058	West	7	Kail	Pinus wallichiana	56
Gunar Range	Dense Pure Conifer	29	35.5607	74.3033	3058	West	8	Kail	Pinus wallichiana	16
Gunar Range	Dense Pure Conifer	29	35.5607	74.3033	3058	West	9	Kail	Pinus wallichiana	16
Gunar Range	Dense Pure Conifer	29	35.5607	74.3033	3058	West	10	Kail	Pinus wallichiana	18
Gunar Range	Dense Pure Conifer	29	35.5607	74.3033	3058	West	11	Kail	Pinus wallichiana	15
Gunar Range	Dense Pure Conifer	29	35.5607	74.3033	3058	West	12	Kail	Pinus wallichiana	30
Gunar Range	Dense Pure Conifer	29	35.5607	74.3033	3058	West	13	Kail	Pinus wallichiana	16
Gunar Range	Dense Pure Conifer	29	35.5607	74.3033	3058	West	14	Kail	Pinus wallichiana	11
Gunar Range	Dense Pure Conifer	29	35.5607	74.3033	3058	West	15	Kail	Pinus wallichiana	17
Gunar Range	Dense Pure Conifer	29	35.5607	74.3033	3058	West	16	Kail	Pinus wallichiana	21
Gunar Range	Dense Pure Conifer	29	35.5607	74.3033	3058	West	17	Kail	Pinus wallichiana	16
Gunar Range	Dense Pure Conifer	29	35.5607	74.3033	3058	West	18	Kail	Pinus wallichiana	11
Gunar Range	Dense Pure Conifer	29	35.5607	74.3033	3058	West	19	Kail	Pinus wallichiana	45
Gunar Range	Dense Pure Conifer	29	35.5607	74.3033	3058	West	27	Kail	Pinus wallichiana	53
Gunar Range	Dense Pure Conifer	29	35.5607	74.3033	3058	West	29	Kail	Pinus wallichiana	68
Gunar Range	Dense Pure Conifer	29	35.5607	74.3033	3058	West	33	Kail	Pinus wallichiana	35
Gunar Range	Dense Pure Conifer	29	35.5607	74.3033	3058	West	35	Kail	Pinus wallichiana	29
Gunar Range	Dense Pure Conifer	31	35.5326	74.3056	2788	North East	26	Kail	Pinus wallichiana	70
Gunar Range	Dense Pure Conifer	31	35.5326	74.3056	2788	North East	30	Kail	Pinus wallichiana	45
Gunar Range	Dense Pure Conifer	31	35.5326	74.3056	2788	North East	31	Kail	Pinus wallichiana	44
Gunar Range	Dense Pure Conifer	32	35.5326	74.3056	2788	North East	4	Kail	Pinus wallichiana	11
Gunar Range	Dense Pure Conifer	32	35.5326	74.3056	2788	North East	5	Kail	Pinus wallichiana	14
Gunar Range	Dense Pure Conifer	32	35.5326	74.3056	2788	North East	7	Kail	Pinus wallichiana	9
Gunar Range	Dense Pure Conifer	32	35.5326	74.3056	2788	North East	12	Kail	Pinus wallichiana	9
Gunar Range	Dense Pure Conifer	32	35.5326	74.3056	2788	North East	13	Kail	Pinus wallichiana	7
Gunar Range	Dense Pure Conifer	32	35.5326	74.3056	2788	North East	20	Kail	Pinus wallichiana	10
Gunar Range	Dense Pure Conifer	32	35.5326	74.3056	2788	North East	22	Kail	Pinus wallichiana	6
Gunar Range	Dense Pure Conifer	32	35.5326	74.3056	2788	North East	23	Kail	Pinus wallichiana	10
Gunar Range	Dense Pure Conifer	32	35.5326	74.3056	2788	North East	25	Kail	Pinus wallichiana	52
Gunar Range	Dense Pure Conifer	32	35.5326	74.3056	2788	North East	26	Kail	Pinus wallichiana	5
Gunar Range	Dense Pure Conifer	32	35.5326	74.3056	2788	North East	27	Kail	Pinus wallichiana	6
Gunar Range	Dense Pure Conifer	32	35.5326	74.3056	2788	North East	28	Kail	Pinus wallichiana	16
Gunar Range	Dense Pure Conifer	32	35.5326	74.3056	2788	North East	31	Kail	Pinus wallichiana	9
Gunar Range	Dense Pure Conifer	32	35.5326	74.3056	2788	North East	33	Kail	Pinus wallichiana	31
Gunar Range	Dense Pure Conifer	32	35.5326	74.3056	2788	North East	34	Kail	Pinus wallichiana	5
Gunar Range	Dense Pure Conifer	33	35.5326	74.3056	2987	South East	1	Kail	Pinus wallichiana	7
Gunar Range	Dense Pure Conifer	33	35.5326	74.3056	2987	South East	2	Kail	Pinus wallichiana	5
Gunar Range	Dense Pure Conifer	33	35.5326	74.3056	2987	South East	6	Kail	Pinus wallichiana	29
Gunar Range	Dense Pure Conifer	33	35.5326	74.3056	2987	South East	14	Kail	Pinus wallichiana	7
Gunar Range	Dense Pure Conifer	33	35.5326	74.3056	2987	South East	17	Kail	Pinus wallichiana	27
Gunar Range	Dense Pure Conifer	33	35.5408	74.3008	2987	South East	20	Kail	Pinus wallichiana	72
Gunar Range	Dense Pure Conifer	33	35.5408	74.3008	2987	South East	21	Kail	Pinus wallichiana	34
Gunar Range	Dense Pure Conifer	33	35.5408	74.3008	2987	South East	22	Kail	Pinus wallichiana	51
Gunar Range	Dense Pure Conifer	33	35.5408	74.3008	2987	South East	23	Kail	Pinus wallichiana	17
Gunar Range	Dense Pure Conifer	33	35.5408	74.3008	2987	South East	24	Kail	Pinus wallichiana	36
Gunar Range	Dense Pure Conifer	34	35.5408	74.3008	2987	South East	1	Kail	Pinus wallichiana	45
Gunar Range	Dense Pure Conifer	34	35.5408	74.3008	2987	South East	4	Kail	Pinus wallichiana	40
Gunar Range	Dense Pure Conifer	34	35.5408	74.3008	2987	South East	5	Kail	Pinus wallichiana	42
Gunar Range	Dense Pure Conifer	34	35.5408	74.3008	2987	South East	6	Kail	Pinus wallichiana	33
Gunar Range	Dense Pure Conifer	34	35.5408	74.3008	2987	South East	7	Kail	Pinus wallichiana	17
Gunar Range	Dense Pure Conifer	34	35.5408	74.3008	2987	South East	8	Kail	Pinus wallichiana	25
Gunar Range	Dense Pure Conifer	34	35.5408	74.3008	2987	South East	9	Kail	Pinus wallichiana	44
Gunar Range	Dense Pure Conifer	34	35.5408	74.3008	2987	South East	10	Kail	Pinus wallichiana	25
Gunar Range	Dense Pure Conifer	34	35.5408	74.3008	2987	South East	11	Kail	Pinus wallichiana	30
Gunar Range	Dense Pure Conifer	34	35.5408	74.3008	2987	South East	12	Kail	Pinus wallichiana	9
Gunar Range	Dense Pure Conifer	34	35.5408	74.3008	2987	South East	13	Kail	Pinus wallichiana	37
Gunar Range	Dense Pure Conifer	34	35.5408	74.3008	2987	South East	14	Kail	Pinus wallichiana	27
Thak Niat BabusarRange	Dense Pure Conifer	34	35.5408	74.3008	2987	South East	15	Kail	Pinus wallichiana	41
Thak Niat BabusarRange	Dense Pure Conifer	34	35.5408	74.3008	2987	South East	16	Kail	Pinus wallichiana	52
Thak Niat BabusarRange	Dense Pure Conifer	34	35.5408	74.3008	2987	South East	18	Kail	Pinus wallichiana	19
Thak Niat BabusarRange	Dense Pure Conifer	34	35.5408	74.3008	2987	South East	19	Kail	Pinus wallichiana	25
Thak Niat BabusarRange	Dense Pure Conifer	34	35.5408	74.3008	2987	South East	22	Kail	Pinus wallichiana	52
Thak Niat Babusar Range	Dense Pure Conifer	34	35.5408	74.3008	2987	South East	23	Kail	Pinus wallichiana	42
Thak Niat Babusar Range	Dense Pure Conifer	34	35.5408	74.3008	2987	South East	26	Kail	Pinus wallichiana	50
Thak Niat Babusar Range	Dense Pure Conifer	34	35.5408	74.3008	2987	South East	27	Kail	Pinus wallichiana	10
Thak Niat Babusar Range	Dense Pure Conifer	34	35.5408	74.3008	2987	South East	28	Kail	Pinus wallichiana	56
Thak Niat Babusar Range	Dense Pure Conifer	35	35.5408	74.3008	2987	South East	1	Kail	Pinus wallichiana	37
Thak Niat Babusar Range	Dense Pure Conifer	35	35.5408	74.3008	2987	South East	2	Kail	Pinus wallichiana	55
Thak Niat Babusar Range	Dense Pure Conifer	35	35.5408	74.3008	2987	South East	4	Kail	Pinus wallichiana	72
Thak Niat Babusar Range	Dense Pure Conifer	35	35.5434	74.3024	3090	South East	6	Kail	Pinus wallichiana	20
Thak Niat Babusar Range	Dense Pure Conifer	35	35.5434	74.3024	3090	South East	7	Kail	Pinus wallichiana	8
Thak Niat Babusar Range	Dense Pure Conifer	35	35.5434	74.3024	3090	South East	8	Kail	Pinus wallichiana	16
Thak Niat Babusar Range	Dense Pure Conifer	35	35.5434	74.3024	3090	South East	9	Kail	Pinus wallichiana	7
Thak Niat Babusar Range	Dense Pure Conifer	35	35.5434	74.3024	3090	South East	11	Kail	Pinus wallichiana	6
Thak Niat Babusar Range	Dense Pure Conifer	35	35.5434	74.3024	3090	South East	12	Kail	Pinus wallichiana	14
Thak Niat Babusar Range	Dense Pure Conifer	35	35.5434	74.3024	3090	South East	13	Kail	Pinus wallichiana	13
Thak Niat Babusar Range	Dense Pure Conifer	35	35.5434	74.3024	3090	South East	15	Kail	Pinus wallichiana	12
Thak Niat Babusar Range	Dense Pure Conifer	35	35.5434	74.3024	3090	South East	16	Kail	Pinus wallichiana	15
Thak Niat Babusar Range	Dense Pure Conifer	35	35.5434	74.3024	3090	South East	17	Kail	Pinus wallichiana	32
Thak Niat Babusar Range	Dense Pure Conifer	35	35.5434	74.3024	3090	South East	18	Kail	Pinus wallichiana	30
Thak Niat Babusar Range	Dense Pure Conifer	35	35.5434	74.3024	3090	South East	19	Kail	Pinus wallichiana	12
Thak Niat Babusar Range	Dense Pure Conifer	35	35.5434	74.3024	3090	South East	20	Kail	Pinus wallichiana	8
Thak Niat Babusar Range	Dense Pure Conifer	35	35.5434	74.3024	3090	South East	21	Kail	Pinus wallichiana	21
Thak Niat Babusar Range	Dense Pure Conifer	35	35.5434	74.3024	3090	South East	22	Kail	Pinus wallichiana	17
Thak Niat Babusar Range	Dense Pure Conifer	35	35.5434	74.3024	3090	South East	23	Kail	Pinus wallichiana	22
Thak Niat Babusar Range	Dense Pure Conifer	35	35.5434	74.3024	3090	South East	24	Kail	Pinus wallichiana	29
Thak Niat Babusar Range	Dense Pure Conifer	35	35.5434	74.3024	3090	South East	25	Kail	Pinus wallichiana	84
Thak Niat Babusar Range	Dense Pure Conifer	35	35.5434	74.3024	3090	South East	27	Kail	Pinus wallichiana	34
Thak Niat Babusar Range	Dense Pure Conifer	36	35.5434	74.3024	3090	South East	1	Kail	Pinus wallichiana	18
Thak Niat Babusar Range	Dense Pure Conifer	36	35.5434	74.3024	3090	South East	2	Kail	Pinus wallichiana	17
Thak Niat Babusar Range	Dense Pure Conifer	36	35.5434	74.3024	3090	South East	4	Kail	Pinus wallichiana	34
Thak Niat Babusar Range	Dense Pure Conifer	36	35.5434	74.3024	3090	South East	5	Kail	Pinus wallichiana	24
Thak Niat Babusar Range	Dense Pure Conifer	36	35.5434	74.3024	3090	South East	6	Kail	Pinus wallichiana	33
Thak Niat Babusar Range	Dense Pure Conifer	36	35.5434	74.3024	3090	South East	9	Kail	Pinus wallichiana	88
Thak Niat Babusar Range	Dense Pure Conifer	36	35.5434	74.3024	3090	South East	10	Kail	Pinus wallichiana	42
Thak Niat Babusar Range	Dense Pure Conifer	36	35.5434	74.3024	3090	South East	11	Kail	Pinus wallichiana	25
Thak Niat Babusar Range	Dense Pure Conifer	36	35.5434	74.3024	3090	South East	13	Kail	Pinus wallichiana	31
Thak Niat Babusar Range	Dense Pure Conifer	36	35.5434	74.3024	3090	South East	14	Kail	Pinus wallichiana	60
Thak Niat Babusar Range	Dense Pure Conifer	36	35.5434	74.3024	3090	South East	16	Kail	Pinus wallichiana	71
Thak Niat Babusar Range	Dense Pure Conifer	36	35.5434	74.3024	3090	South East	18	Kail	Pinus wallichiana	16
Thak Niat Babusar Range	Dense Pure Conifer	36	35.5434	74.3024	3090	South East	20	Kail	Pinus wallichiana	32
Thak Niat Babusar Range	Dense Pure Conifer	36	35.5434	74.3024	3090	South East	21	Kail	Pinus wallichiana	21
Thak Niat Babusar Range	Dense Pure Conifer	36	35.5434	74.3024	3090	South East	22	Kail	Pinus wallichiana	72
Thak Niat Babusar Range	Dense Pure Conifer	36	35.5434	74.3024	3090	South East	23	Kail	Pinus wallichiana	34
Thak Niat Babusar Range	Dense Pure Conifer	36	35.5434	74.3024	3090	South East	24	Kail	Pinus wallichiana	28
Thak Niat Babusar Range	Dense Pure Conifer	36	35.5434	74.3024	3090	South East	25	Kail	Pinus wallichiana	50
Thak Niat Babusar Range	Dense Pure Conifer	36	35.5434	74.3024	3090	South East	26	Kail	Pinus wallichiana	20
Thak Niat Babusar Range	Dense Pure Conifer	36	35.5434	74.3024	3090	South East	27	Kail	Pinus wallichiana	19
Thak Niat Babusar Range	Dense Pure Conifer	36	35.5434	74.3024	3090	South East	28	Kail	Pinus wallichiana	30
Thak Niat Babusar Range	Dense Pure Conifer	36	35.5434	74.3024	3090	South East	29	Kail	Pinus wallichiana	23.0356
Thak Niat Babusar Range	Dense Mix Forests	2	35.4034	73.7678	2348	North	6	Oak	Quercus ilex	26.4433
Thak Niat Babusar Range	Dense Mix Forests	2	35.4034	73.7678	2348	North	8	Oak	Quercus ilex	18.5605
Thak Niat Babusar Range	Dense Mix Forests	2	35.4034	73.7678	2348	North	9	Oak	Quercus ilex	18.4433
Thak Niat Babusar Range	Dense Mix Forests	2	35.4034	73.7678	2348	North	10	Oak	Quercus ilex	27.2675
Thak Niat Babusar Range	Dense Mix Forests	2	35.4034	73.7678	2348	North	11	Oak	Quercus ilex	29.6752
Thak Niat Babusar Range	Dense Mix Forests	2	35.4034	73.7678	2348	North	12	Oak	Quercus ilex	18.5605
Thak Niat Babusar Range	Dense Mix Forests	2	35.4034	73.7678	2348	North	17	Oak	Quercus ilex	21.3554
Thak Niat Babusar Range	Dense Mix Forests	2	35.4034	73.7678	2348	North	19	Oak	Quercus ilex	18.707
Thak Niat Babusar Range	Dense Mix Forests	2	35.4034	73.7678	2348	North	20	Oak	Quercus ilex	11.6484
Thak Niat Babusar Range	Dense Mix Forests	2	35.4034	73.7678	2348	North	21	Oak	Quercus ilex	20.3847
Thak Niat Babusar Range	Dense Mix Forests	2	35.4034	73.7678	2348	North	22	Oak	Quercus ilex	19.707
Thak Niat Babusar Range	Dense Mix Forests	3	35.4034	73.7678	2348	North	1	Oak	Quercus ilex	15.6592
Thak Niat Babusar Range	Dense Mix Forests	3	35.4034	73.7678	2348	North	2	Oak	Quercus ilex	8.89162
Thak Niat Babusar Range	Dense Mix Forests	3	35.4034	73.7678	2348	North	8	Oak	Quercus ilex	39.7987
Thak Niat Babusar Range	Dense Mix Forests	3	35.4034	73.7678	2348	North	9	Oak	Quercus ilex	29.121
Thak Niat Babusar Range	Dense Mix Forests	3	35.4034	73.7678	2348	North	11	Oak	Quercus ilex	23.2968
Thak Niat Babusar Range	Dense Mix Forests	3	35.4034	73.7678	2348	North	12	Oak	Quercus ilex	22.3261
Thak Niat Babusar Range	Dense Mix Forests	3	35.4034	73.7678	2348	North	13	Oak	Quercus ilex	41.7401
Thak Niat Babusar Range	Dense Pure Conifer	11	35.3607	73.7609	2399	South	6	Oak	Quercus ilex	13
Thak Niat Babusar Range	Dense Pure Conifer	11	35.3607	73.7609	2399	South	7	Oak	Quercus ilex	15
Thak Niat Babusar Range	Dense Pure Conifer	11	35.3607	73.7609	2399	South	8	Oak	Quercus ilex	17
Thak Niat Babusar Range	Sparse Mix Forests	20	35.5166	74.3065	2687	North East	1	Oak	Quercus ilex	15
Thore Range	Sparse Mix Forests	20	35.5166	74.3065	2687	North East	2	Oak	Quercus ilex	20
Thore Range	Sparse Mix Forests	20	35.5166	74.3065	2687	North East	3	Oak	Quercus ilex	16
Thore Range	Sparse Mix Forests	20	35.5166	74.3065	2687	North East	4	Oak	Quercus ilex	14
Thore Range	Sparse Mix Forests	20	35.5166	74.3065	2687	North East	9	Oak	Quercus ilex	9
Thore Range	Sparse Mix Forests	20	35.5166	74.3065	2687	North East	10	Oak	Quercus ilex	18
Thore Range	Sparse Mix Forests	20	35.5166	74.3065	2687	North East	11	Oak	Quercus ilex	12
Thore Range	Sparse Mix Forests	20	35.5166	74.3065	2687	North East	12	Oak	Quercus ilex	18
Thak Niat Babusar Range	Sparse Mix Forests	20	35.5166	74.3065	2687	North East	13	Oak	Quercus ilex	11
Thak Niat Babusar Range	Sparse Mix Forests	20	35.5166	74.3065	2687	North East	14	Oak	Quercus ilex	17
Thak Niat Babusar Range	Sparse Mix Forests	20	35.5166	74.3065	2687	North East	15	Oak	Quercus ilex	22
Thak Niat Babusar Range	Sparse Mix Forests	21	35.5166	74.3065	2687	North East	1	Oak	Quercus ilex	15
Thak Niat Babusar Range	Sparse Mix Forests	21	35.5166	74.3065	2687	North East	2	Oak	Quercus ilex	19
Thak Niat Babusar Range	Sparse Mix Forests	21	35.5166	74.3065	2687	North East	3	Oak	Quercus ilex	29
Thak Niat Babusar Range	Sparse Mix Forests	21	35.5166	74.3065	2687	North East	5	Oak	Quercus ilex	12
Thak Niat Babusar Range	Sparse Mix Forests	21	35.5166	74.3065	2687	North East	6	Oak	Quercus ilex	16
Thak Niat Babusar Range	Sparse Mix Forests	21	35.5166	74.3065	2687	North East	7	Oak	Quercus ilex	19
Thak Niat Babusar Range	Sparse Mix Forests	21	35.5166	74.3065	2687	North East	8	Oak	Quercus ilex	27
Thak Niat Babusar Range	Sparse Mix Forests	21	35.5166	74.3065	2687	North East	9	Oak	Quercus ilex	14
Thore Range	Sparse Mix Forests	21	35.5166	74.3065	2687	North East	10	Oak	Quercus ilex	26
Thore Range	Sparse Mix Forests	21	35.5166	74.3065	2687	North East	11	Oak	Quercus ilex	44
Thore Range	Sparse Mix Forests	22	35.5166	74.3065	2687	North East	1	Oak	Quercus ilex	19
Thore Range	Sparse Mix Forests	22	35.5166	74.3065	2687	North East	3	Oak	Quercus ilex	13
Thore Range	Sparse Mix Forests	22	35.5166	74.3065	2687	North East	4	Oak	Quercus ilex	22
Thore Range	Sparse Mix Forests	22	35.5166	74.3065	2687	North East	5	Oak	Quercus ilex	10
Thore Range	Sparse Mix Forests	22	35.5166	74.3065	2687	North East	6	Oak	Quercus ilex	21
Thore Range	Sparse Mix Forests	22	35.5166	74.3065	2687	North East	7	Oak	Quercus ilex	31
Thore Range	Sparse Mix Forests	22	35.5166	74.3065	2687	North East	8	Oak	Quercus ilex	16
Thore Range	Sparse Mix Forests	22	35.5166	74.3065	2687	North East	9	Oak	Quercus ilex	25
Thore Range	Sparse Mix Forests	22	35.5166	74.3065	2687	North East	10	Oak	Quercus ilex	25
Thak Niat Babusar Range	Sparse Mix Forests	22	35.5166	74.3065	2687	North East	11	Oak	Quercus ilex	17
Thak Niat Babusar Range	Sparse Mix Forests	23	35.5166	74.3065	2687	North East	1	Oak	Quercus ilex	25
Thak Niat Babusar Range	Sparse Mix Forests	23	35.5166	74.3065	2687	North East	2	Oak	Quercus ilex	26
Thak Niat Babusar Range	Sparse Mix Forests	23	35.5166	74.3065	2687	North East	4	Oak	Quercus ilex	14
Thak Niat Babusar Range	Sparse Mix Forests	23	35.5166	74.3065	2687	North East	5	Oak	Quercus ilex	15
Thak Niat Babusar Range	Sparse Mix Forests	23	35.5166	74.3065	2687	North East	7	Oak	Quercus ilex	20
Thak Niat Babusar Range	Sparse Mix Forests	23	35.5166	74.3065	2687	North East	8	Oak	Quercus ilex	14
Thak Niat Babusar Range	Sparse Mix Forests	23	35.5166	74.3065	2687	North East	9	Oak	Quercus ilex	17
Thak Niat Babusar Range	Sparse Mix Forests	23	35.5166	74.3065	2687	North East	10	Oak	Quercus ilex	18
Thak Niat Babusar Range	Sparse Mix Forests	23	35.5166	74.3065	2687	North East	12	Oak	Quercus ilex	22
Thak Niat Babusar Range	Sparse Mix Forests	23	35.5166	74.3065	2687	North East	13	Oak	Quercus ilex	19
Thak Niat Babusar Range	Sparse Mix Forests	23	35.5166	74.3065	2687	North East	16	Oak	Quercus ilex	15
Thak Niat Babusar Range	Sparse Mix Forests	23	35.5166	74.3065	2687	North East	17	Oak	Quercus ilex	16
Thak Niat Babusar Range	Sparse Mix Forests	23	35.5166	74.3065	2687	North East	20	Oak	Quercus ilex	20
Thak Niat Babusar Range	Sparse Mix Forests	23	35.5166	74.3065	2687	North East	21	Oak	Quercus ilex	29
Thak Niat Babusar Range	Dense Pure Conifer	3	35.3933	73.7703	2589	North East	19	Spruce	Picea smithiana	38.828
Thak Niat Babusar Range	Dense Pure Conifer	3	35.3933	73.7703	2589	North East	20	Spruce	Picea smithiana	49.6229
Thak Niat Babusar Range	Dense Pure Conifer	4	35.3933	73.7703	2589	North East	1	Spruce	Picea smithiana	61.3006
Thak Niat Babusar Range	Dense Pure Conifer	4	35.3933	73.7703	2589	North East	5	Spruce	Picea smithiana	39.8866
Thak Niat Babusar Range	Dense Pure Conifer	8	35.5581	74.5122	3021	South East	11	Spruce	Picea smithiana	49.5057
Thak Niat Babusar Range	Dense Pure Conifer	8	35.5581	74.5122	3021	South East	12	Spruce	Picea smithiana	51.4471
Thak Niat Babusar Range	Dense Pure Conifer	8	35.5581	74.5122	3021	South East	13	Spruce	Picea smithiana	57.2713
Thak Niat Babusar Range	Dense Pure Conifer	8	35.5581	74.5122	3021	South East	15	Spruce	Picea smithiana	46.5936
Thak Niat Babusar Range	Dense Pure Conifer	8	35.5581	74.5122	3021	South East	16	Spruce	Picea smithiana	20.4818
Thak Niat Babusar Range	Dense Pure Conifer	8	35.5581	74.5122	3021	South East	17	Spruce	Picea smithiana	70.8611
Thak Niat Babusar Range	Dense Pure Conifer	8	35.5581	74.5122	3021	South East	18	Spruce	Picea smithiana	97.0701
Thak Niat Babusar Range	Dense Pure Conifer	8	35.5581	74.5122	3021	South East	19	Spruce	Picea smithiana	63.0955
Thak Niat Babusar Range	Dense Pure Conifer	8	35.5581	74.5122	3021	South East	23	Spruce	Picea smithiana	95.1287
Thak Niat Babusar Range	Dense Pure Conifer	8	35.5581	74.5122	3021	South East	24	Spruce	Picea smithiana	62.1248
Thak Niat Babusar Range	Dense Pure Conifer	8	35.5581	74.5122	3021	South East	25	Spruce	Picea smithiana	72.8025
Thak Niat Babusar Range	Dense Pure Conifer	9	35.3698	73.9002	2916	North	22	Spruce	Picea Smithiana	104
Thak Niat Babusar Range	Dense Pure Conifer	9	35.3698	73.9002	2916	North	23	Spruce	Picea Smithiana	80
Thak Niat Babusar Range	Dense Pure Conifer	9	35.3698	73.9002	2916	North	24	Spruce	Picea Smithiana	54
Thak Niat Babusar Range	Dense Pure Conifer	9	35.3698	73.9002	2916	North	25	Spruce	Picea Smithiana	100
Thak Niat Babusar Range	Dense Pure Conifer	9	35.3698	73.9002	2916	North	26	Spruce	Picea Smithiana	98
Thak Niat Babusar Range	Dense Pure Conifer	10	35.3698	73.9002	2916	North	1	Spruce	Picea Smithiana	53
Thak Niat Babusar Range	Dense Pure Conifer	10	35.3698	73.9002	2916	North	3	Spruce	Picea Smithiana	63
Thak Niat Babusar Range	Dense Pure Conifer	10	35.3698	73.9002	2916	North	4	Spruce	Picea Smithiana	52
Thak Niat Babusar Range	Dense Pure Conifer	10	35.3698	73.9002	2916	North	5	Spruce	Picea Smithiana	78
Thak Niat Babusar Range	Dense Pure Conifer	10	35.3698	73.9002	2916	North	6	Spruce	Picea Smithiana	35
Thak Niat Babusar Range	Dense Pure Conifer	10	35.3698	73.9002	2916	North	7	Spruce	Picea Smithiana	82
Thak Niat Babusar Range	Dense Mix Forests	14	35.54	74.31	2763	South	2	Spruce	Picea Smithiana	16.5
Thak Niat Babusar Range	Dense Mix Forests	14	35.54	74.31	2763	South	3	Spruce	Picea Smithiana	43
Thak Niat Babusar Range	Dense Mix Forests	14	35.54	74.31	2763	South	5	Spruce	Picea Smithiana	30
Thak Niat Babusar Range	Dense Mix Forests	14	35.54	74.31	2763	South	8	Spruce	Picea Smithiana	13
Thak Niat Babusar Range	Dense Mix Forests	14	35.54	74.31	2763	South	9	Spruce	Picea Smithiana	12
Thak Niat Babusar Range	Dense Mix Forests	14	35.54	74.31	2763	South	10	Spruce	Picea Smithiana	12
Thak Niat Babusar Range	Dense Mix Forests	14	35.54	74.31	2763	South	13	Spruce	Picea Smithiana	48
Thak Niat Babusar Range	Dense Mix Forests	14	35.54	74.31	2763	South	14	Spruce	Picea Smithiana	37
Thak Niat Babusar Range	Dense Mix Forests	14	35.54	74.31	2763	South	15	Spruce	Picea Smithiana	37
Thak Niat Babusar Range	Dense Mix Forests	14	35.54	74.31	2763	South	16	Spruce	Picea Smithiana	35
Thak Niat Babusar Range	Dense Mix Forests	14	35.54	74.31	2763	South	17	Spruce	Picea Smithiana	16
Thak Niat Babusar Range	Dense Mix Forests	14	35.54	74.31	2763	South	18	Spruce	Picea Smithiana	22
Thak Niat Babusar Range	Dense Mix Forests	14	35.54	74.31	2763	South	20	Spruce	Picea Smithiana	33
Thak Niat Babusar Range	Dense Mix Forests	14	35.54	74.31	2763	South	21	Spruce	Picea Smithiana	21
Gunar Range	Dense Mix Forests	14	35.54	74.31	2763	South	22	Spruce	Picea Smithiana	28
Gunar Range	Dense Mix Forests	14	35.54	74.31	2763	South	23	Spruce	Picea Smithiana	27
Gunar Range	Dense Mix Forests	15	35.54	74.31	2763	South	1	Spruce	Picea Smithiana	20
Gunar Range	Dense Mix Forests	15	35.54	74.31	2763	South	2	Spruce	Picea Smithiana	49
Gunar Range	Dense Mix Forests	15	35.54	74.31	2763	South	8	Spruce	Picea Smithiana	31
Gunar Range	Dense Mix Forests	15	35.54	74.31	2763	South	9	Spruce	Picea Smithiana	13
Gunar Range	Dense Mix Forests	15	35.54	74.31	2763	South	10	Spruce	Picea Smithiana	13
Gunar Range	Dense Mix Forests	15	35.54	74.31	2763	South	15	Spruce	Picea Smithiana	28
Gunar Range	Dense Mix Forests	15	35.54	74.31	2763	South	16	Spruce	Picea Smithiana	16
Gunar Range	Dense Mix Forests	16	35.54	74.31	2763	South	10	Spruce	Picea Smithiana	26
Gunar Range	Dense Mix Forests	16	35.54	74.31	2763	South	11	Spruce	Picea Smithiana	39
Gunar Range	Dense Mix Forests	16	35.54	74.31	2763	South	12	Spruce	Picea Smithiana	30
Gunar Range	Sparse Pure Conifer	18	35.5329	74.307	2817	South West	11	Spruce	Picea Smithiana	50
Gunar Range	Sparse Pure Conifer	19	35.5329	74.307	2817	South West	1	Spruce	Picea Smithiana	81
Gunar Range	Sparse Pure Conifer	19	35.5329	74.307	2817	South West	3	Spruce	Picea Smithiana	79
Gunar Range	Sparse Pure Conifer	19	35.5329	74.307	2817	South West	4	Spruce	Picea Smithiana	49
Gunar Range	Sparse Pure Conifer	19	35.5329	74.307	2817	South West	8	Spruce	Picea Smithiana	8
Gunar Range	Sparse Pure Conifer	19	35.5329	74.307	2817	South West	9	Spruce	Picea Smithiana	11
Gunar Range	Sparse Pure Conifer	19	35.5329	74.307	2817	South West	10	Spruce	Picea Smithiana	19
Gunar Range	Dense Mix Forests	24	35.5356	74.308	2887	South West	2	Spruce	Picea Smithiana	53
Gunar Range	Dense Mix Forests	24	35.5356	74.308	2887	South West	3	Spruce	Picea Smithiana	47
Gunar Range	Dense Mix Forests	24	35.5356	74.308	2887	South West	4	Spruce	Picea Smithiana	41
Gunar Range	Dense Mix Forests	24	35.5356	74.308	2887	South West	5	Spruce	Picea Smithiana	14
Gunar Range	Dense Mix Forests	24	35.5356	74.308	2887	South West	6	Spruce	Picea Smithiana	24
Gunar Range	Dense Mix Forests	24	35.5356	74.308	2887	South West	7	Spruce	Picea Smithiana	26.5
Gunar Range	Dense Mix Forests	24	35.5356	74.308	2887	South West	9	Spruce	Picea Smithiana	46
Gunar Range	Dense Mix Forests	24	35.5356	74.308	2887	South West	10	Spruce	Picea Smithiana	75
Gunar Range	Dense Mix Forests	24	35.5356	74.308	2887	South West	11	Spruce	Picea Smithiana	38
Gunar Range	Dense Mix Forests	24	35.5356	74.308	2887	South West	17	Spruce	Picea Smithiana	80
Gunar Range	Dense Mix Forests	24	35.5356	74.308	2887	South West	18	Spruce	Picea Smithiana	36
Gunar Range	Dense Mix Forests	24	35.5356	74.308	2887	South West	19	Spruce	Picea Smithiana	111
Gunar Range	Dense Mix Forests	24	35.5356	74.308	2887	South West	20	Spruce	Picea Smithiana	41
Gunar Range	Dense Mix Forests	24	35.5356	74.308	2887	South West	21	Spruce	Picea Smithiana	14
Gunar Range	Dense Mix Forests	24	35.5356	74.308	2887	South West	22	Spruce	Picea Smithiana	12
Gunar Range	Dense Mix Forests	25	35.5356	74.308	2887	South West	1	Spruce	Picea Smithiana	7
Gunar Range	Dense Mix Forests	25	35.5356	74.308	2887	South West	2	Spruce	Picea Smithiana	66
Gunar Range	Dense Mix Forests	25	35.5356	74.308	2887	South West	3	Spruce	Picea Smithiana	124
Gunar Range	Dense Mix Forests	25	35.5356	74.308	2887	South West	5	Spruce	Picea Smithiana	120
Gunar Range	Dense Mix Forests	25	35.5356	74.308	2887	South West	7	Spruce	Picea Smithiana	60
Gunar Range	Dense Mix Forests	25	35.5356	74.308	2887	South West	8	Spruce	Picea Smithiana	86
Gunar Range	Dense Pure Conifer	25	35.5391	74.3058	2941	West	9	Spruce	Picea Smithiana	60
Gunar Range	Dense Pure Conifer	25	35.5391	74.3058	2941	West	10	Spruce	Picea Smithiana	34
Gunar Range	Dense Pure Conifer	25	35.5391	74.3058	2941	West	11	Spruce	Picea Smithiana	25
Gunar Range	Dense Pure Conifer	25	35.5391	74.3058	2941	West	12	Spruce	Picea Smithiana	30
Gunar Range	Dense Pure Conifer	25	35.5391	74.3058	2941	West	13	Spruce	Picea Smithiana	31
Gunar Range	Dense Pure Conifer	25	35.5391	74.3058	2941	West	14	Spruce	Picea Smithiana	25
Gunar Range	Dense Pure Conifer	25	35.5391	74.3058	2941	West	15	Spruce	Picea Smithiana	42
Gunar Range	Dense Pure Conifer	25	35.5391	74.3058	2941	West	16	Spruce	Picea Smithiana	31
Gunar Range	Dense Pure Conifer	25	35.5391	74.3058	2941	West	17	Spruce	Picea Smithiana	36
Gunar Range	Dense Pure Conifer	25	35.5391	74.3058	2941	West	18	Spruce	Picea Smithiana	28
Gunar Range	Dense Pure Conifer	25	35.5391	74.3058	2941	West	19	Spruce	Picea Smithiana	23
Gunar Range	Dense Pure Conifer	25	35.5391	74.3058	2941	West	20	Spruce	Picea Smithiana	26
Gunar Range	Dense Pure Conifer	25	35.5391	74.3058	2941	West	21	Spruce	Picea Smithiana	33
Gunar Range	Dense Pure Conifer	25	35.5391	74.3058	2941	West	22	Spruce	Picea Smithiana	42
Gunar Range	Dense Pure Conifer	25	35.5391	74.3058	2941	West	23	Spruce	Picea Smithiana	29
Gunar Range	Dense Pure Conifer	25	35.5391	74.3058	2941	West	24	Spruce	Picea Smithiana	45.5
Gunar Range	Dense Pure Conifer	25	35.5391	74.3058	2941	West	25	Spruce	Picea Smithiana	21
Gunar Range	Dense Pure Conifer	25	35.5391	74.3058	2941	West	26	Spruce	Picea Smithiana	42
Gunar Range	Dense Pure Conifer	25	35.5391	74.3058	2941	West	27	Spruce	Picea Smithiana	16
Gunar Range	Dense Pure Conifer	25	35.5391	74.3058	2941	West	28	Spruce	Picea Smithiana	33
Gunar Range	Dense Pure Conifer	25	35.5391	74.3058	2941	West	29	Spruce	Picea Smithiana	25
Gunar Range	Dense Pure Conifer	26	35.5391	74.3058	2941	West	`1	Spruce	Picea Smithiana	32
Gunar Range	Dense Pure Conifer	26	35.5391	74.3058	2941	West	2	Spruce	Picea Smithiana	24
Gunar Range	Dense Pure Conifer	26	35.5391	74.3058	2941	West	`2	Spruce	Picea Smithiana	28
Gunar Range	Dense Pure Conifer	26	35.5391	74.3058	2941	West	3	Spruce	Picea Smithiana	30
Gunar Range	Dense Pure Conifer	26	35.5391	74.3058	2941	West	`3	Spruce	Picea Smithiana	33
Gunar Range	Dense Pure Conifer	26	35.5391	74.3058	2941	West	4	Spruce	Picea Smithiana	11
Gunar Range	Dense Pure Conifer	26	35.5391	74.3058	2941	West	`4	Spruce	Picea Smithiana	28
Gunar Range	Dense Pure Conifer	26	35.5391	74.3058	2941	West	5	Spruce	Picea Smithiana	14
Gunar Range	Dense Pure Conifer	26	35.5391	74.3058	2941	West	`5	Spruce	Picea Smithiana	27
Gunar Range	Dense Pure Conifer	26	35.5391	74.3058	2941	West	6	Spruce	Picea Smithiana	35.5
Gunar Range	Dense Pure Conifer	26	35.5391	74.3058	2941	West	`6	Spruce	Picea Smithiana	37
Gunar Range	Dense Pure Conifer	26	35.5391	74.3058	2941	West	7	Spruce	Picea Smithiana	19
Gunar Range	Dense Pure Conifer	26	35.5391	74.3058	2941	West	`7	Spruce	Picea Smithiana	36
Gunar Range	Dense Pure Conifer	26	35.5391	74.3058	2941	West	8	Spruce	Picea Smithiana	18
Gunar Range	Dense Pure Conifer	26	35.5391	74.3058	2941	West	`8	Spruce	Picea Smithiana	16
Gunar Range	Dense Pure Conifer	26	35.5391	74.3058	2941	West	9	Spruce	Picea Smithiana	48
Gunar Range	Dense Pure Conifer	26	35.5391	74.3058	2941	West	`9	Spruce	Picea Smithiana	14
Gunar Range	Dense Pure Conifer	26	35.5391	74.3058	2941	West	10	Spruce	Picea Smithiana	30
Gunar Range	Dense Pure Conifer	26	35.5391	74.3058	2941	West	`10	Spruce	Picea Smithiana	29
Gunar Range	Dense Pure Conifer	26	35.5391	74.3058	2941	West	11	Spruce	Picea Smithiana	19
Gunar Range	Dense Pure Conifer	26	35.5391	74.3058	2941	West	`11	Spruce	Picea Smithiana	18
Gunar Range	Dense Pure Conifer	26	35.5391	74.3058	2941	West	12	Spruce	Picea Smithiana	22
Gunar Range	Dense Pure Conifer	26	35.5391	74.3058	2941	West	`12	Spruce	Picea Smithiana	30
Gunar Range	Dense Pure Conifer	26	35.5391	74.3058	2941	West	13	Spruce	Picea Smithiana	29.5
Gunar Range	Dense Pure Conifer	26	35.5391	74.3058	2941	West	`13	Spruce	Picea Smithiana	39
Gunar Range	Dense Pure Conifer	26	35.5391	74.3058	2941	West	14	Spruce	Picea Smithiana	36
Gunar Range	Dense Pure Conifer	26	35.5391	74.3058	2941	West	`14	Spruce	Picea Smithiana	24
Gunar Range	Dense Pure Conifer	26	35.5391	74.3058	2941	West	15	Spruce	Picea Smithiana	34
Gunar Range	Dense Pure Conifer	26	35.5391	74.3058	2941	West	`15	Spruce	Picea Smithiana	21
Gunar Range	Dense Pure Conifer	26	35.5489	74.303	3051	South West	16	Spruce	Picea Smithiana	41
Gunar Range	Dense Pure Conifer	26	35.5489	74.303	3051	South West	`16	Spruce	Picea Smithiana	29
Gunar Range	Dense Pure Conifer	26	35.5489	74.303	3051	South West	`17	Spruce	Picea Smithiana	35
Gunar Range	Dense Pure Conifer	26	35.5489	74.303	3051	South West	`18	Spruce	Picea Smithiana	22.5
Gunar Range	Dense Pure Conifer	26	35.5489	74.303	3051	South West	19	Spruce	Picea Smithiana	20
Gunar Range	Dense Pure Conifer	27	35.5489	74.303	3051	South West	1	Spruce	Picea Smithiana	16.2
Gunar Range	Dense Pure Conifer	27	35.5489	74.303	3051	South West	2	Spruce	Picea Smithiana	17
Gunar Range	Dense Pure Conifer	27	35.5489	74.303	3051	South West	3	Spruce	Picea Smithiana	22.5
Gunar Range	Dense Pure Conifer	27	35.5489	74.303	3051	South West	5	Spruce	Picea Smithiana	15
Gunar Range	Dense Pure Conifer	27	35.5489	74.303	3051	South West	7	Spruce	Picea Smithiana	19
Gunar Range	Dense Pure Conifer	27	35.5489	74.303	3051	South West	8	Spruce	Picea Smithiana	60
Gunar Range	Dense Pure Conifer	27	35.5489	74.303	3051	South West	9	Spruce	Picea Smithiana	27
Gunar Range	Dense Pure Conifer	27	35.5489	74.303	3051	South West	11	Spruce	Picea Smithiana	19
Gunar Range	Dense Pure Conifer	27	35.5489	74.303	3051	South West	12	Spruce	Picea Smithiana	17
Gunar Range	Dense Pure Conifer	27	35.5489	74.303	3051	South West	18	Spruce	Picea Smithiana	31
Gunar Range	Dense Pure Conifer	27	35.5489	74.303	3051	South West	21	Spruce	Picea Smithiana	21
Gunar Range	Dense Pure Conifer	27	35.5489	74.303	3051	South West	24	Spruce	Picea Smithiana	34
Gunar Range	Dense Pure Conifer	27	35.5489	74.303	3051	South West	25	Spruce	Picea Smithiana	31
Gunar Range	Dense Pure Conifer	27	35.5489	74.303	3051	South West	26	Spruce	Picea Smithiana	65
Gunar Range	Dense Pure Conifer	28	35.5489	74.303	3051	South West	5	Spruce	Picea Smithiana	42
Gunar Range	Dense Pure Conifer	28	35.5607	74.3033	3058	West	6	Spruce	Picea Smithiana	65
Gunar Range	Dense Pure Conifer	28	35.5607	74.3033	3058	West	7	Spruce	Picea Smithiana	19
Gunar Range	Dense Pure Conifer	28	35.5607	74.3033	3058	West	8	Spruce	Picea Smithiana	29
Gunar Range	Dense Pure Conifer	28	35.5607	74.3033	3058	West	11	Spruce	Picea Smithiana	17
Gunar Range	Dense Pure Conifer	28	35.5607	74.3033	3058	West	12	Spruce	Picea Smithiana	17
Gunar Range	Dense Pure Conifer	28	35.5607	74.3033	3058	West	13	Spruce	Picea Smithiana	21
Gunar Range	Dense Pure Conifer	28	35.5607	74.3033	3058	West	17	Spruce	Picea Smithiana	19
Gunar Range	Dense Pure Conifer	28	35.5607	74.3033	3058	West	18	Spruce	Picea Smithiana	21
Gunar Range	Dense Pure Conifer	28	35.5607	74.3033	3058	West	19	Spruce	Picea Smithiana	17
Gunar Range	Dense Pure Conifer	28	35.5607	74.3033	3058	West	20	Spruce	Picea Smithiana	48
Gunar Range	Dense Pure Conifer	28	35.5607	74.3033	3058	West	21	Spruce	Picea Smithiana	33
Gunar Range	Dense Pure Conifer	28	35.5607	74.3033	3058	West	22	Spruce	Picea Smithiana	20
Gunar Range	Dense Pure Conifer	28	35.5607	74.3033	3058	West	23	Spruce	Picea Smithiana	34
Gunar Range	Dense Pure Conifer	28	35.5607	74.3033	3058	West	24	Spruce	Picea Smithiana	19
Gunar Range	Dense Pure Conifer	28	35.5607	74.3033	3058	West	25	Spruce	Picea Smithiana	26
Gunar Range	Dense Pure Conifer	28	35.5607	74.3033	3058	West	26	Spruce	Picea Smithiana	16
Gunar Range	Dense Pure Conifer	28	35.5607	74.3033	3058	West	27	Spruce	Picea Smithiana	65
Gunar Range	Dense Pure Conifer	28	35.5607	74.3033	3058	West	28	Spruce	Picea Smithiana	18
Gunar Range	Dense Pure Conifer	28	35.5607	74.3033	3058	West	29	Spruce	Picea Smithiana	22
Gunar Range	Dense Pure Conifer	28	35.5607	74.3033	3058	West	31	Spruce	Picea Smithiana	14
Gunar Range	Dense Pure Conifer	28	35.5607	74.3033	3058	West	33	Spruce	Picea Smithiana	24
Gunar Range	Dense Pure Conifer	28	35.5607	74.3033	3058	West	34	Spruce	Picea Smithiana	22
Gunar Range	Dense Pure Conifer	28	35.5607	74.3033	3058	West	36	Spruce	Picea Smithiana	11
Gunar Range	Dense Pure Conifer	28	35.5607	74.3033	3058	West	37	Spruce	Picea Smithiana	11
Gunar Range	Dense Pure Conifer	28	35.5607	74.3033	3058	West	38	Spruce	Picea Smithiana	19
Gunar Range	Dense Pure Conifer	28	35.5607	74.3033	3058	West	39	Spruce	Picea Smithiana	16
Gunar Range	Dense Pure Conifer	29	35.5607	74.3033	3058	West	1	Spruce	Picea Smithiana	79
Gunar Range	Dense Pure Conifer	29	35.5607	74.3033	3058	West	2	Spruce	Picea Smithiana	16
Gunar Range	Dense Pure Conifer	29	35.5607	74.3033	3058	West	3	Spruce	Picea Smithiana	44
Gunar Range	Dense Pure Conifer	29	35.5607	74.3033	3058	West	4	Spruce	Picea Smithiana	45
Gunar Range	Dense Pure Conifer	29	35.5607	74.3033	3058	West	5	Spruce	Picea Smithiana	19
Gunar Range	Dense Pure Conifer	29	35.5607	74.3033	3058	West	6	Spruce	Picea Smithiana	18
Gunar Range	Dense Pure Conifer	29	35.5607	74.3033	3058	West	20	Spruce	Picea Smithiana	28
Gunar Range	Dense Pure Conifer	29	35.5607	74.3033	3058	West	21	Spruce	Picea Smithiana	9
Gunar Range	Dense Pure Conifer	29	35.5607	74.3033	3058	West	22	Spruce	Picea Smithiana	7
Thak Niat BabusarRange	Dense Pure Conifer	29	35.5607	74.3033	3058	West	23	Spruce	Picea Smithiana	12
Thak Niat BabusarRange	Dense Pure Conifer	29	35.5607	74.3033	3058	West	24	Spruce	Picea Smithiana	14
Thak Niat BabusarRange	Dense Pure Conifer	29	35.5607	74.3033	3058	West	25	Spruce	Picea Smithiana	11
Thak Niat BabusarRange	Dense Pure Conifer	29	35.5607	74.3033	3058	West	26	Spruce	Picea Smithiana	9
Thak Niat BabusarRange	Dense Pure Conifer	29	35.5607	74.3033	3058	West	28	Spruce	Picea Smithiana	23
Thak Niat BabusarRange	Dense Pure Conifer	29	35.5607	74.3033	3058	West	30	Spruce	Picea Smithiana	62
Thak Niat BabusarRange	Dense Pure Conifer	29	35.5607	74.3033	3058	West	31	Spruce	Picea Smithiana	70
Thak Niat BabusarRange	Dense Pure Conifer	29	35.5607	74.3033	3058	West	32	Spruce	Picea Smithiana	21
Thak Niat BabusarRange	Dense Pure Conifer	29	35.5607	74.3033	3058	West	34	Spruce	Picea Smithiana	23
Thak Niat BabusarRange	Dense Pure Conifer	29	35.5607	74.3033	3058	West	36	Spruce	Picea Smithiana	21
Thak Niat BabusarRange	Dense Pure Conifer	29	35.5167	74.3064	2631	West	37	Spruce	Picea Smithiana	83
Thak Niat BabusarRange	Dense Pure Conifer	29	35.5167	74.3064	2631	West	38	Spruce	Picea Smithiana	36
Thak Niat BabusarRange	Dense Pure Conifer	30	35.5167	74.3064	2631	West	1	Spruce	Picea Smithiana	28
Thak Niat BabusarRange	Dense Pure Conifer	30	35.5167	74.3064	2631	West	2	Spruce	Picea Smithiana	37
Thak Niat Babusar Range	Dense Pure Conifer	30	35.5167	74.3064	2631	West	3	Spruce	Picea Smithiana	64
Thak Niat Babusar Range	Dense Pure Conifer	30	35.5167	74.3064	2631	West	4	Spruce	Picea Smithiana	27
Thak Niat Babusar Range	Dense Pure Conifer	30	35.5167	74.3064	2631	West	5	Spruce	Picea Smithiana	22
Thak Niat Babusar Range	Dense Pure Conifer	30	35.5167	74.3064	2631	West	6	Spruce	Picea Smithiana	55
Thak Niat Babusar Range	Dense Pure Conifer	30	35.5167	74.3064	2631	West	7	Spruce	Picea Smithiana	21
Thak Niat Babusar Range	Dense Pure Conifer	30	35.5167	74.3064	2631	West	8	Spruce	Picea Smithiana	50
Thak Niat Babusar Range	Dense Pure Conifer	30	35.5167	74.3064	2631	West	9	Spruce	Picea Smithiana	32
Thak Niat Babusar Range	Dense Pure Conifer	30	35.5167	74.3064	2631	West	10	Spruce	Picea Smithiana	84
Thak Niat Babusar Range	Dense Pure Conifer	30	35.5167	74.3064	2631	West	11	Spruce	Picea Smithiana	12
Thak Niat Babusar Range	Dense Pure Conifer	30	35.5167	74.3064	2631	West	12	Spruce	Picea Smithiana	38
Thak Niat Babusar Range	Dense Pure Conifer	30	35.5167	74.3064	2631	West	13	Spruce	Picea Smithiana	92
Thak Niat Babusar Range	Dense Pure Conifer	30	35.5167	74.3064	2631	West	14	Spruce	Picea Smithiana	32
Gunar Range	Dense Pure Conifer	30	35.5167	74.3064	2631	West	15	Spruce	Picea Smithiana	69
Gunar Range	Dense Pure Conifer	30	35.5167	74.3064	2631	West	16	Spruce	Picea Smithiana	70
Gunar Range	Dense Pure Conifer	30	35.5327	74.3056	2743	North West	17	Spruce	Picea Smithiana	67
Gunar Range	Dense Pure Conifer	30	35.5327	74.3056	2743	North West	18	Spruce	Picea Smithiana	36
Gunar Range	Dense Pure Conifer	30	35.5327	74.3056	2743	North West	19	Spruce	Picea Smithiana	6
Gunar Range	Dense Pure Conifer	30	35.5327	74.3056	2743	North West	20	Spruce	Picea Smithiana	7
Gunar Range	Dense Pure Conifer	30	35.5327	74.3056	2743	North West	21	Spruce	Picea Smithiana	25
Gunar Range	Dense Pure Conifer	30	35.5327	74.3056	2743	North West	22	Spruce	Picea Smithiana	10
Gunar Range	Dense Pure Conifer	30	35.5327	74.3056	2743	North West	23	Spruce	Picea Smithiana	63
Gunar Range	Dense Pure Conifer	30	35.5327	74.3056	2743	North West	24	Spruce	Picea Smithiana	7
Gunar Range	Dense Pure Conifer	30	35.5327	74.3056	2743	North West	25	Spruce	Picea Smithiana	8
Gunar Range	Dense Pure Conifer	30	35.5327	74.3056	2743	North West	26	Spruce	Picea Smithiana	9
Gunar Range	Dense Pure Conifer	30	35.5327	74.3056	2743	North West	27	Spruce	Picea Smithiana	5
Gunar Range	Dense Pure Conifer	30	35.5327	74.3056	2743	North West	28	Spruce	Picea Smithiana	5
Gunar Range	Dense Pure Conifer	30	35.5327	74.3056	2743	North West	29	Spruce	Picea Smithiana	6
Gunar Range	Dense Pure Conifer	30	35.5327	74.3056	2743	North West	30	Spruce	Picea Smithiana	11
Gunar Range	Dense Pure Conifer	30	35.5327	74.3056	2743	North West	31	Spruce	Picea Smithiana	11
Gunar Range	Dense Pure Conifer	30	35.5327	74.3056	2743	North West	32	Spruce	Picea Smithiana	7
Gunar Range	Dense Pure Conifer	30	35.5327	74.3056	2743	North West	33	Spruce	Picea Smithiana	10
Gunar Range	Dense Pure Conifer	30	35.5327	74.3056	2743	North West	34	Spruce	Picea Smithiana	10
Gunar Range	Dense Pure Conifer	30	35.5327	74.3056	2743	North West	35	Spruce	Picea Smithiana	86
Gunar Range	Dense Pure Conifer	30	35.5327	74.3056	2743	North West	36	Spruce	Picea Smithiana	85
Gunar Range	Dense Pure Conifer	30	35.5327	74.3056	2743	North West	37	Spruce	Picea Smithiana	12
Gunar Range	Dense Pure Conifer	30	35.5327	74.3056	2743	North West	38	Spruce	Picea Smithiana	39
Gunar Range	Dense Pure Conifer	30	35.5327	74.3056	2743	North West	39	Spruce	Picea Smithiana	9
Gunar Range	Dense Pure Conifer	31	35.5327	74.3056	2743	North West	1	Spruce	Picea Smithiana	8
Gunar Range	Dense Pure Conifer	31	35.5327	74.3056	2743	North West	2	Spruce	Picea Smithiana	11
Gunar Range	Dense Pure Conifer	31	35.5327	74.3056	2743	North West	3	Spruce	Picea Smithiana	13
Gunar Range	Dense Pure Conifer	31	35.5327	74.3056	2743	North West	4	Spruce	Picea Smithiana	13
Gunar Range	Dense Pure Conifer	31	35.5327	74.3056	2743	North West	5	Spruce	Picea Smithiana	44
Gunar Range	Dense Pure Conifer	31	35.5327	74.3056	2743	North West	6	Spruce	Picea Smithiana	34
Gunar Range	Dense Pure Conifer	31	35.5327	74.3056	2743	North West	7	Spruce	Picea Smithiana	19
Gunar Range	Dense Pure Conifer	31	35.5327	74.3056	2743	North West	8	Spruce	Picea Smithiana	20
Gunar Range	Dense Pure Conifer	31	35.5327	74.3056	2743	North West	9	Spruce	Picea Smithiana	43
Gunar Range	Dense Pure Conifer	31	35.5327	74.3056	2743	North West	10	Spruce	Picea Smithiana	71
Gunar Range	Dense Pure Conifer	31	35.5327	74.3056	2743	North West	11	Spruce	Picea Smithiana	68
Gunar Range	Dense Pure Conifer	31	35.5327	74.3056	2743	North West	14	Spruce	Picea Smithiana	28
Gunar Range	Dense Pure Conifer	31	35.5327	74.3056	2743	North West	17	Spruce	Picea Smithiana	55
Gunar Range	Dense Pure Conifer	31	35.5327	74.3056	2743	North West	18	Spruce	Picea Smithiana	42
Gunar Range	Dense Pure Conifer	31	35.5327	74.3056	2743	North West	19	Spruce	Picea Smithiana	14
Gunar Range	Dense Pure Conifer	31	35.5327	74.3056	2743	North West	20	Spruce	Picea Smithiana	63
Gunar Range	Dense Pure Conifer	31	35.5327	74.3056	2743	North West	21	Spruce	Picea Smithiana	22
Gunar Range	Dense Pure Conifer	31	35.5327	74.3056	2743	North West	23	Spruce	Picea Smithiana	37
Gunar Range	Dense Pure Conifer	31	35.5327	74.3056	2743	North West	24	Spruce	Picea Smithiana	10
Gunar Range	Dense Pure Conifer	31	35.5327	74.3056	2743	North West	25	Spruce	Picea Smithiana	7
Gunar Range	Dense Pure Conifer	31	35.5326	74.3056	2788	North East	27	Spruce	Picea Smithiana	13
Gunar Range	Dense Pure Conifer	31	35.5326	74.3056	2788	North East	28	Spruce	Picea Smithiana	15
Gunar Range	Dense Pure Conifer	31	35.5326	74.3056	2788	North East	29	Spruce	Picea Smithiana	30
Gunar Range	Dense Pure Conifer	31	35.5326	74.3056	2788	North East	32	Spruce	Picea Smithiana	9
Gunar Range	Dense Pure Conifer	32	35.5326	74.3056	2788	North East	1	Spruce	Picea Smithiana	45
Gunar Range	Dense Pure Conifer	32	35.5326	74.3056	2788	North East	2	Spruce	Picea Smithiana	9
Gunar Range	Dense Pure Conifer	32	35.5326	74.3056	2788	North East	3	Spruce	Picea Smithiana	14
Gunar Range	Dense Pure Conifer	32	35.5326	74.3056	2788	North East	6	Spruce	Picea Smithiana	9
Gunar Range	Dense Pure Conifer	32	35.5326	74.3056	2788	North East	8	Spruce	Picea Smithiana	5
Gunar Range	Dense Pure Conifer	32	35.5326	74.3056	2788	North East	9	Spruce	Picea Smithiana	44
Gunar Range	Dense Pure Conifer	32	35.5326	74.3056	2788	North East	10	Spruce	Picea Smithiana	9
Gunar Range	Dense Pure Conifer	32	35.5326	74.3056	2788	North East	11	Spruce	Picea Smithiana	22
Gunar Range	Dense Pure Conifer	32	35.5326	74.3056	2788	North East	14	Spruce	Picea Smithiana	8
Gunar Range	Dense Pure Conifer	32	35.5326	74.3056	2788	North East	15	Spruce	Picea Smithiana	22
Gunar Range	Dense Pure Conifer	32	35.5326	74.3056	2788	North East	16	Spruce	Picea Smithiana	8
Gunar Range	Dense Pure Conifer	32	35.5326	74.3056	2788	North East	17	Spruce	Picea Smithiana	7
Gunar Range	Dense Pure Conifer	32	35.5326	74.3056	2788	North East	18	Spruce	Picea Smithiana	11
Chilas head quarter Range	Dense Pure Conifer	32	35.5326	74.3056	2788	North East	19	Spruce	Picea Smithiana	33
Chilas head quarter Range	Dense Pure Conifer	32	35.5326	74.3056	2788	North East	21	Spruce	Picea Smithiana	5
Chilas head quarter Range	Dense Pure Conifer	32	35.5326	74.3056	2788	North East	24	Spruce	Picea Smithiana	9
Chilas head quarter Range	Dense Pure Conifer	32	35.5326	74.3056	2788	North East	29	Spruce	Picea Smithiana	25
Chilas head quarter Range	Dense Pure Conifer	32	35.5326	74.3056	2788	North East	30	Spruce	Picea Smithiana	18
Chilas head quarter Range	Dense Pure Conifer	32	35.5326	74.3056	2788	North East	32	Spruce	Picea Smithiana	39
Chilas head quarter Range	Dense Pure Conifer	32	35.5326	74.3056	2788	North East	35	Spruce	Picea Smithiana	25
Chilas head quarter Range	Dense Pure Conifer	33	35.5326	74.3056	2987	South East	3	Spruce	Picea Smithiana	5
Chilas head quarter Range	Dense Pure Conifer	33	35.5326	74.3056	2987	South East	4	Spruce	Picea Smithiana	36
Chilas head quarter Range	Dense Pure Conifer	33	35.5326	74.3056	2987	South East	5	Spruce	Picea Smithiana	21
Chilas head quarter Range	Dense Pure Conifer	33	35.5326	74.3056	2987	South East	7	Spruce	Picea Smithiana	18
Chilas head quarter Range	Dense Pure Conifer	33	35.5326	74.3056	2987	South East	8	Spruce	Picea Smithiana	31
Chilas head quarter Range	Dense Pure Conifer	33	35.5326	74.3056	2987	South East	9	Spruce	Picea Smithiana	15
Chilas head quarter Range	Dense Pure Conifer	33	35.5326	74.3056	2987	South East	10	Spruce	Picea Smithiana	18
Chilas head quarter Range	Dense Pure Conifer	33	35.5326	74.3056	2987	South East	11	Spruce	Picea Smithiana	23
Chilas head quarter Range	Dense Pure Conifer	33	35.5326	74.3056	2987	South East	12	Spruce	Picea Smithiana	19
Chilas head quarter Range	Dense Pure Conifer	33	35.5326	74.3056	2987	South East	13	Spruce	Picea Smithiana	19
Chilas head quarter Range	Dense Pure Conifer	33	35.5326	74.3056	2987	South East	15	Spruce	Picea Smithiana	21
Chilas head quarter Range	Dense Pure Conifer	33	35.5326	74.3056	2987	South East	16	Spruce	Picea Smithiana	28
Thore Range	Dense Pure Conifer	33	35.5326	74.3056	2987	South East	18	Spruce	Picea Smithiana	27
Thore Range	Dense Pure Conifer	33	35.5326	74.3056	2987	South East	19	Spruce	Picea Smithiana	31
Thore Range	Dense Pure Conifer	34	35.5408	74.3008	2987	South East	2	Spruce	Picea Smithiana	25
Thore Range	Dense Pure Conifer	34	35.5408	74.3008	2987	South East	3	Spruce	Picea Smithiana	34
Thore Range	Dense Pure Conifer	34	35.5408	74.3008	2987	South East	21	Spruce	Picea Smithiana	9
Thore Range	Dense Pure Conifer	35	35.5408	74.3008	2987	South East	3	Spruce	Picea Smithiana	53
Thore Range	Dense Pure Conifer	35	35.5408	74.3008	2987	South East	5	Spruce	Picea Smithiana	46
Thore Range	Dense Pure Conifer	35	35.5434	74.3024	3090	South East	26	Spruce	Picea Smithiana	19
Gunar Range	Dense Pure Conifer	36	35.5434	74.3024	3090	South East	12	Spruce	Picea Smithiana	39
Gunar Range	Dense Pure Conifer	36	35.5434	74.3024	3090	South East	17	Spruce	Picea Smithiana	28
Gunar Range	Dense Pure Conifer	36	35.5434	74.3024	3090	South East	19	Spruce	Picea Smithiana	21
Gunar Range	Dense Mix Forests	15	35.54	74.31	2763	South	3	Yew	Taxus baccata	19
Gunar Range	Dense Mix Forests	15	35.54	74.31	2763	South	4	Yew	Taxus baccata	21
Gunar Range	Dense Mix Forests	15	35.54	74.31	2763	South	5	Yew	Taxus baccata	20
Gunar Range	Dense Mix Forests	15	35.54	74.31	2763	South	6	Yew	Taxus baccata	17
Gunar Range	Dense Mix Forests	15	35.54	74.31	2763	South	7	Yew	Taxus baccata	22
Chilas head quarter Range	Dense Mix Forests	15	35.54	74.31	2763	South	27	Yew	Taxus baccata	53
Chilas head quarter Range	Dense Mix Forests	15	35.54	74.31	2763	South	28	Yew	Taxus baccata	26
Chilas head quarter Range	Dense Mix Forests	15	35.54	74.31	2763	South	29	Yew	Taxus baccata	45
Chilas head quarter Range	Dense Mix Forests	16	35.54	74.31	2763	South	1	Yew	Taxus baccata	49
Chilas head quarter Range	Dense Mix Forests	16	35.54	74.31	2763	South	2	Yew	Taxus baccata	40
Chilas head quarter Range	Dense Mix Forests	16	35.54	74.31	2763	South	3	Yew	Taxus baccata	22
Chilas Head Quater Range	Dense Mix Forests	16	35.54	74.31	2763	South	4	Yew	Taxus baccata	18
Gunar Range	Dense Mix Forests	16	35.54	74.31	2763	South	5	Yew	Taxus baccata	31
Gunar Range	Dense Mix Forests	16	35.54	74.31	2763	South	6	Yew	Taxus baccata	24
Gunar Range	Dense Mix Forests	16	35.54	74.31	2763	South	7	Yew	Taxus baccata	15
Gunar Range	Dense Mix Forests	16	35.54	74.31	2763	South	8	Yew	Taxus baccata	16
Gunar Range	Dense Mix Forests	16	35.54	74.31	2763	South	9	Yew	Taxus baccata	26
