# Supplementary material for: Deforestation perspectives of dry temperate forests: main drivers and possible strategies
Source: Frontiers journal article supplement (doi:10.3389/fenvs.2023.1151320), 2023-08-17
Supplement: Table_2.XLSX [file Table_2.XLSX]

## Sheet: Sheet1
Respondents	Unsustainable fuel wood extraction	Unsustainable timber extraction	Forest Fires (Intentional)	Forest Fires (natural or due to negligence)	Infrastructure Development	Free and uncontrolled livestock grazing	Urban & rural expansion / habitation	Agricultural expansion for subsistence	Floods, Landslides, heavy Snowfall	Pests	Weak governance
1	1	1	0	0	0	1	1	1	0	0	1
2	1	1	0	0	0	1	1	1	0	0	1
3	1	1	0	0	0	1	1	1	1	0	1
4	1	1	0	0	0	0	1	1	0	0	1
5	1	1	0	0	1	1	1	1	0	0	1
6	1	1	0	0	1	0	0	1	1	0	1
7	1	1	0	0	0	1	0	1	0	1	1
8	1	1	0	1	0	1	1	1	0	0	1
9	1	1	0	0	0	1	1	1	0	0	1
10	1	1	0	0	0	1	0	1	0	1	0
11	1	1	1	1	0	1	1	1	0	0	0
12	1	1	0	0	1	1	0	1	0	0	0
13	0	1	0	0	1	0	1	1	0	0	1
14	1	0	0	0	0	1	1	1	0	0	1
15	1	1	0	0	1	0	0	0	1	0	1
16	1	1	0	0	0	0	0	0	0	0	0
17	1	1	0	0	1	1	0	0	0	0	0
18	1	1	0	0	0	1	1	0	0	0	0
19	1	1	0	0	0	1	1	0	0	1	0
20	1	1	0	0	0	1	1	0	0	0	0
21	1	1	0	0	0	0	1	1	0	0	0
22	1	1	0	0	1	1	1	0	0	0	1
23	1	1	0	0	0	1	1	0	0	0	1
24	1	1	0	0	0	1	0	0	0	0	0
25	1	1	0	0	1	0	0	0	1	0	0
26	1	1	0	0	0	1	0	0	0	0	0
27	0	1	0	0	0	1	1	0	0	0	0
28	1	0	0	0	0	1	1	1	0	0	0
29	1	1	0	0	1	1	1	0	0	0	1
30	1	1	1	1	0	1	1	1	0	0	1
31	1	1	1	0	0	1		1	0	0	0
32	1	1	0	0	1	0	1	1	0	1	1
33	1	1	0	0	0	1	1	1	0	0	0
34	1	1	0	0	0	1	1	0	0	0	1
35	1	1	1	1	0	1	1	0	0	1	0
36	1	1	0	0	0	0	1	1	1	0	0
37	1	1	0	0	0	1	1	0	0	0	0
38	0	1	0	0	0	0	1	0	0	0	0
39	0	1	0	0	1	1	0	1	0	0	1
40	1	0	0	0	0	1	1	0	0	0	0
41	1	1	0	0	0	0	1	0	0	0	0
42	1	1	0	0	0	0	1	1	1	0	1
43	1	1	0	0	0	1	1	0	1	0	0
44	1	1	0	0	1	1	1	0	0	1	0
45	1	1	1	0	1	1	1	0	0	0	0
46	1	1	0	0	0	1	1	0	1	0	1
47	1	1	0	0	0	0	0	1	0	0	0
48	1	0	0	0	0	0	1	0	0	0	0
49	1	1	0	0	0	1	1	0	0	0	1
50	1	1	0	0	0	1	1	1	0	0	0
51	0	1	0	1	1	0	1	1	1	0	0
52	1	1	0	0	0	1	1	1	1	0	0
53	1	0	0	0	0	1	1	0	0	1	0
54	1	1	0	0	1	1	1	1	0	0	1
55	0	1	0	0	1	0	1	0	0	0	1
56	1	1	0	1	0	1	0	0	0	1	0
57	1	1	0	0	0	1	0	1	1	0	0
58	1	1	0	0	0	0	1	0	0	0	0
59	1	1	0	0	0	0	1	0	0	0	0
60	1	1	0	0	1	0	1	0	1	0	0
61	1	1	0	0	0	0	1	1	0	0	1
62	1	0	0	0	0	1	1	0	0	0	1
63	1	1	0	0	0	1	1	0	0	0	0
64	1	1	0	0	0	0	1	1	0	0	1
65	0	1	0	0	0	0	1	0	0	1	0
66	1	1	0	0	0	1	0	0	1	0	1
67	1	1	0	0	0	1	1	1	0	0	0
68	1	1	0	0	0	1	1	0	0	0	0
69	1	1	0	0	1	1	1	0	0	0	0
70	1	1	1	0	0	1	1	0	0	0	0
71	1	1	0	0	0	1	1	0	0	0	1
72	1	1	0	0	0	1	1	1	0	1	0
73	1	1	0	0	0	0	1	0	1	0	0
74	0	1	0	0	0	1	0	0	0	0	1
75	1	0	0	0	0	1	1	0	1	1	0
76	1	1	0	0	1	1	1	0	1	0	0
77	1	1	0	0	0	1	1	1	1	0	0
78	1	1	0	1	0	1	1	0	1	0	1
79	1	1	0	0	0	1	1	0	0	0	0
80	1	1	0	0	0	0	0	0	0	0	0
81	1	1	1	1	0	0	1	1	1	0	1
82	1	1	1	1	1	1	1	0	0	0	0
83	1	1	1	1	1	1	1	0	0	0	0
84	0	0	0	0	0	0	1	0	1	1	0
85	1	1	1	0	0	1	0	0	0	0	0
86	1	1	0	0	0	1	0	1	0	0	0
87	1	1	0	0	0	1	0	0	1	0	0
88	1	1	0	1	0	1	1	0	0	1	1
89	1	1	0	0	0	1	1	0	0	0	0
90	1	1	0	0	0	1	1	0	0	0	0
91	1	1	0	1	1	0	1	1	0	1	0
92	1	1	0	1	0	0	0	1	1	0	0
93	1	1	0	1	0	1	1	0	0	0	1
94	1	1	0	1	0	1	1	0	0	0	0
95	1	1	0	0	0	1	1	0	1	0	0
96	1	1	0	0	0	1	1	0	1	0	0
97	1	1	1	1	0	1	1	1	1	0	1
98	1	1	0	0	1	1	1	0	0	0	1
99	1	1	1	0	1	1	0	0	1	0	0
100	1	1	0	0	0	1	1	0	0	1	0
101	1	1	0	0	0	1	1	0	0	0	0
102	1	1	0	0	0	0	0	1	1	0	0
103	1	1	1	1	1	1	1	1	0	0	0
104	1	1	0	0	0	1	1	1	0	0	1
105	1	1	0	0	0	1	0	0	0	0	1
106	1	0	0	0	0	1	0	0	1	0	0
107	1	1	0	0	0	1	1	0	0	1	1
108	1	1	0	0	0	1	1	0	0	0	0
109	1	1	0	0	1	1	1	0	1	0	1
110	1	1	0	0	0	0	1	1	0	1	0
111	1	1	0	0	0	1	1	0	0	0	0
112	1	1	0	0	0	1	0	0	0	0	0
113	1	1	0	1	0	1	1	0	0	0	0
114	0	1	0	1	0	1	1	0	0	0	1
115	1	1	0	1	1	1	1	0	0	0	0
116	1	0	0	0	1	1	0	0	0	0	0
117	1	1	0	0	1	1	1	0	1	0	1
118	1	1	0	0	0	1	1	0	1	0	0
119	1	1	0	0	0	1	1	0	1	1	0
120	1	1	0	1	1	0	1	0	0	0	0
121	1	1	1	0	0	1	0	1	0	0	1
122	1	1	0	1	0	1	1	0	0	0	0
123	1	1	0	1	0	1	1	0	0	0	0
124	1	1	0	0	1	1	1	0	0	0	1
125	0	1	0	0	0	1	1	1	1	0	0
126	1	1	0	0	0	1	1	0	0	0	0
127	1	1	0	1	1	0	0	1	0	0	0
128	1	0	0	0	1	0	1	0	0	0	0
129	1	1	0	1	0	1	1	0	0	0	0
130	1	1	0	1	0	1	1	0	0	0	0
131	1	1	0	0	1	1	1	0	0	0	1
132	1	1	0	0	0	1	1	1	0	0	0
133	1	1	0	0	1	1	1	1	0	0	0
134	1	1	0	0	1	1	0	0	0	0	0
135	1	1	0	0	0	0	1	0	0	0	0
136	1	1	0	0	0	0	1	1	1	0	1
137	1	1	0	0	0	0	1	0	0	1	0
138	1	1	0	0	0	1	1	0	0	0	0
139	0	0	0	0	0	1	1	0	0	0	0
140	1	1	0	0	0	1	0	1	1	1	1
141	1	1	0	1	0	1	0	0	0	0	1
142	1	1	0	0	0	1	0	0	1	0	0
143	1	1	0	0	0	1	0	0	0	0	0
144	1	1	1	1	0	1	1	1	0	0	0
145	1	1	0	0	1	1	1	0	0	0	0
146	1	1	1	0	1	0	1	0	0	0	0
147	1	1	0	0	0	0	1	0	0	0	1
148	1	1	0	0	0	1	1	1	1	0	1
149	1	1	0	0	0	1	1	0	0	1	0
150	1	1	0	0	0	1	1	0	0	0	1
151	1	1	0	0	1	0	0	0	0	0	0
152	1	1	0	0	1	1	1	1	1	0	1
153	1	1	0	1	1	1	0	0	0	0	0
154	0	1	0	0	0	1	1	0	1	0	0
155	1	1	0	0	0	1	0	0	0	0	0
156	1	1	0	0	0	1	1	0	1	1	0
157	1	1	0	0	0	1	1	1	0	0	1
158	1	1	0	0	0	1	1	0	0	0	0
159	1	1	0	0	0	1	1	0	0	1	0
160	1	1	0	0	0	1	1	0	0	0	1
161	1	1	0	0	0	0	1	1	1	0	0
162	1	1	0	0	1	1	1	0	0	0	0
163	1	1	1	1	1	1	0	0	1	0	0
164	1	1	0	0	1	1	1	1	0	0	1
165	1	1	0	0	0	0	1	1	1	0	0
166	0	1	0	0	0	1	1	0	0	0	0
167	1	0	0	0	0	1	1	1	0	0	1
168	1	1	0	0	0	1	1	0	1	1	0
169	1	1	0	0	0	1	0	0	0	0	0
170	1	1	0	0	1	0	1	0	0	0	0
171	1	1	0	0	0	1	1	0	0	0	0
172	1	1	0	0	0	1	1	1	0	0	0
173	0	1	0	0	1	0	1	0	1	0	0
174	1	0	0	1	0	1	0	0	0	0	1
175	1	1	0	0	0	1	1	0	0	0	0
176	0	1	0	0	1	1	1	0	0	0	0
177	1	1	0	0	1	1	0	1	0	0	0
178	1	1	0	0	0	1	1	0	1	0	0
179	1	1	1	0	0	0	1	0	0	0	1
180	1	1	0	1	0	0	0	1	0	0	1
181	1	0	0	1	1	1	1	1	1	0	1
182	0	1	0	0	0	0	1	0	1	0	0
183	1	1	0	0	0	1	1	0	0	0	0
184	1	1	0	1	0	1	1	0	0	0	0
185	1	1	0	0	1	0	0	0	1	0	0
186	1	1	0	0	0	1	1	1	0	0	0
187	0	1	0	0	1	1	1	1	0	1	1
188	1	1	0	0	0	0	0	1	0	0	1
189	1	0	1	1	0	0	1	1	0	0	0
190	1	1	0	1	1	0	1	0	1	1	1
191	1	0	0	0	1	0	1	0	0	0	0
192	1	1	0	0	0	0	0	1	0	0	1
193	1	1	0	0	0	0	1	1	0	0	0
194	1	1	0	0	1	1	1	1	0	0	0
195	1	1	0	1	1	1	1	1	1	0	0
196	0	1	0	0	0	1	0	1	0	0	0
197	1	1	0	0	0	0	1	1	0	0	1
198	1	0	0	1	1	1	1	1	1	0	0
199	1	1	1	0	1	1	0	0	1	1	0
200	1	1	0	1	0	1	1	1	0	0	1
