# Supplementary material for: Deforestation perspectives of dry temperate forests: main drivers and possible strategies
Source: Frontiers journal article supplement (doi:10.3389/fenvs.2023.1151320), 2023-08-17
Supplement: Table_3.XLSX [file Table_3.XLSX]

## Sheet: Sheet1
Respondents	Wood energy needs	Food security	Lack of alternate livelihoods in rural areas	Poor extension services	No demarcation of boundaries	Unsustainable forest management	Poor implementation of laws	Political pressure on forest officers
1	1	0	0	0	1	0	0	0
2	0	1	0	1	0	0	0	0
3	1	1	0	0	0	0	0	1
4	1	1	1	0	1	1	0	0
5	0	1	1	1	0	1	0	0
6	1	0	0	0	0	1	0	1
7	1	0	1	0	0	0	1	0
8	1	0	0	0	0	0	1	0
9	0	1	0	0	0	0	0	0
10	1	1	0	0	0	1	1	0
11	1	1	1	0	0	1	0	0
12	1	0	0	0	0	1	0	0
13	1	0	1	0	1	0	0	0
14	1	0	0	1	0	0	1	0
15	0	0	0	0	0	0	0	1
16	0	0	0	0	0	1	1	0
17	1	0	0	0	0	1	0	0
18	1	1	0	0	0	1	0	0
19	0	1	0	0	1	1	0	0
20	1	0	1	0	0	0	0	0
21	1	0	1	0	0	0	0	0
22	0	1	0	0	0	0	0	0
23	1	0	0	0	0	1	1	0
24	1	0	1	0	0	1	1	0
25	1	1	0	0	0	1	0	0
26	1	0	0	0	0	0	0	0
27	1	0	1	1	0	0	1	0
28	1	0	0	0	0	0	0	1
29	1	0	0	0	0	0	0	0
30	1	1	0	1	0	0	1	0
31	1	1	0	0	0	0	0	1
32	1	1	1	0	1	1	0	0
33	1	0	0	0	0	1	1	0
34	1	0	1	0	0	0	1	0
35	0	0	0	0	1	0	0	0
36	1	0	0	0	0	1	1	0
37	0	0	0	0	0	0	0	0
38	1	0	0	0	0	0	0	0
39	1	1	0	1	0	1	0	0
40	1	1	0	0	1	0	1	1
41	1	0	1	0	0	0	0	0
42	1	0	1	0	0	0	1	0
43	1	0	0	0	1	0	0	0
44	1	0	1	0	0	1	0	0
45	0	0	1	0	0	1	0	0
46	0	1	1	0	0	1	1	0
47	1	0	0	0	0	0	1	0
48	1	0	0	1	0	0	0	0
49	1	1	0	0	1	0	1	1
50	1	0	0	0	0	0	0	0
51	1	0	0	1	0	0	0	0
52	1	1	0	0	1	0	0	1
53	1	0	1	0	0	1	1	0
54	1	0	1	0	0	1	0	0
55	1	0	0	0	0	0	1	0
56	0	0	0	0	0	0	0	0
57	1	0	0	0	0	0	0	0
58	1	0	0	0	1	0	1	0
59	1	0	0	0	0	0	1	0
60	1	0	1	1	0	1	0	0
61	1	1	0	0	1	0	1	1
62	1	0	0	0	0	0	0	0
63	1	0	1	0	0	1	0	0
64	1	1	0	0	0	0	0	0
65	1	0	0	0	0	0	0	0
66	0	0	1	0	0	1	0	0
67	1	0	0	1	0	0	1	0
68	1	1	0	0	0	0	1	1
69	1	0	0	0	0	0	0	0
70	1	0	0	1	0	0	1	0
71	0	1	0	0	1	0	0	1
72	1	0	0	0	0	0	0	0
73	1	0	0	0	0	0	0	0
74	1	0	0	0	1	0	1	0
75	1	0	1	0	0	1	0	0
76	1	1	0	0	0	0	0	0
77	1	1	0	0	0	0	1	0
78	1	0	1	0	0	1	1	0
79	1	0	0	1	0	0	0	0
80	0	0	0	0	0	0	1	1
81	1	0	0	0	0	0	0	0
82	1	0	1	0	0	1	0	0
83	1	1	1	1	1	0	0	0
84	0	1	1	0	0	0	1	1
85	0	0	0	0	0	1	0	0
86	1	1	0	1	1	0	1	0
87	1	0	0	0	0	0	0	1
88	1	0	0	0	0	0	0	0
89	1	0	0	0	0	0	0	0
90	1	1	0	0	0	0	0	0
91	1	0	1	0	0	0	0	0
92	1	0	1	0	0	0	1	0
93	1	0	0	0	0	0	1	0
94	0	1	0	0	0	0	0	0
95	1	0	0	1	0	0	1	0
96	1	0	0	0	0	0	0	1
97	1	1	0	0	0	1	0	0
98	1	1	1	0	0	1	0	0
99	1	0	0	0	1	1	1	0
100	1	0	0	0	0	0	0	0
101	0	1	1	0	0	0	1	0
102	0	0	0	1	1	0	0	0
103	1	0	0	0	0	1	0	1
104	1	0	1	0	0	1	0	0
105	1	0	0	1	0	1	0	0
106	1	0	0	0	0	0	0	1
107	1	0	0	0	0	0	0	0
108	1	0	0	0	0	0	1	0
109	1	0	0	0	0	0	1	0
110	0	1	0	0	0	0	0	0
111	0	0	0	0	1	0	0	0
112	1	0	0	0	0	1	1	0
113	0	0	1	0	0	1	0	0
114	1	1	0	1	0	0	0	0
115	1	0	0	0	1	0	1	1
116	1	0	1	0	0	1	0	0
117	1	1	0	0	0	0	0	0
118	1	1	0	0	1	0	0	0
119	1	1	0	0	0	1	0	0
120	1	0	0	0	0	0	0	0
121	1	1	0	0	0	0	1	0
122	0	0	0	0	0	0	1	0
123	1	1	0	0	0	0	0	0
124	1	0	0	0	1	1	1	0
125	1	0	0	0	0	1	0	0
126	1	0	1	0	0	1	0	0
127	1	0	1	0	0	0	0	0
128	1	1	1	0	1	0	1	0
129	1	0	0	0	0	0	0	0
130	0	0	0	0	0	0	1	0
131	1	1	0	0	1	0	0	0
132	1	0	0	1	0	0	0	0
133	1	0	0	0	0	1	0	1
134	1	0	0	0	0	1	0	0
135	1	1	1	1	0	0	0	0
136	1	0	1	0	0	0	0	1
137	0	0	0	0	0	0	1	0
138	1	1	0	0	0	0	1	0
139	1	1	0	0	0	0	0	0
140	1	0	0	0	0	1	1	0
141	1	0	0	0	0	0	0	0
142	1	0	1	0	0	0	0	0
143	1	1	0	0	0	1	0	0
144	1	1	0	1	0	0	1	0
145	0	0	1	0	0	0	0	1
146	0	0	0	0	1	1	1	0
147	1	0	0	0	0	0	0	0
148	1	0	1	0	0	0	0	0
149	1	0	0	0	0	0	0	0
150	1	1	0	0	0	0	0	0
151	1	1	0	1	0	0	0	0
152	1	0	0	0	0	0	0	1
153	1	1	0	0	0	0	1	0
154	0	0	0	1	0	0	1	0
155	1	1	1	0	0	1	0	1
156	1	0	0	0	0	0	0	0
157	1	0	0	0	0	0	0	0
158	1	0	1	0	0	1	0	0
159	1	0	1	0	0	0	1	0
160	1	1	0	0	0	0	1	0
161	1	0	0	0	0	0	0	0
162	1	0	0	0	0	1	1	0
163	1	1	1	1	0	0	0	0
164	1	0	1	0	1	0	0	1
165	1	0	0	0	0	1	0	0
166	0	1	0	0	0	0	1	0
167	1	0	0	0	0	0	0	0
168	1	0	0	0	0	0	1	0
169	1	0	0	0	0	0	0	0
170	1	0	1	0	0	0	0	0
171	1	0	1	0	0	0	0	0
172	1	0	0	0	0	0	1	0
173	1	1	1	0	0	0	1	0
174	1	0	0	0	0	0	0	0
175	0	0	1	0	0	0	1	0
176	1	0	0	0	0	0	0	0
177	1	0	0	0	0	1	0	0
178	0	1	0	0	0	1	0	0
179	1	1	0	0	0	1	1	0
180	1	1	0	0	0	0	0	0
181	1	0	0	0	0	0	1	0
182	1	0	1	1	0	0	0	0
183	1	0	1	0	0	1	0	1
184	1	0	1	0	0	1	0	0
185	1	0	0	1	0	1	0	0
186	1	1	0	0	0	0	0	1
187	0	1	0	0	0	0	0	0
188	1	0	0	0	0	0	1	0
189	1	0	0	0	0	0	1	0
190	1	0	1	0	1	0	0	0
191	1	0	1	0	0	0	0	0
192	1	0	0	0	0	1	1	0
193	1	1	0	0	0	1	0	0
194	1	1	0	1	0	0	0	0
195	0	0	0	0	0	0	1	1
196	0	1	0	0	0	1	0	0
197	1	0	1	0	1	0	0	0
198	0	1	1	0	0	0	0	0
199	1	0	0	0	0	1	0	0
200	1	0	1	0	0	0	0	0
